# Supplementary material
Source: publisher figshare collection journal article supplement (https://acs.figshare.com/ndownloader/files/5064613)

# The $\alpha$ -Heteroarylation of Esters, Lactones, Amides and Lactams by Nucleophilic Aromatic Substitution

Hong C. Shen,\* Fa-Xiang Ding and Steven L. Colletti

Department of Medicinal Chemistry

Merck Research Laboratories

Merck & Co., Inc.

P. O. Box 2000

Rahway, NJ 07065-0900

[hong\\_shen@merck.com](mailto:hong_shen@merck.com)

All experiments were carried out in oven-dried glassware under an atmosphere of dry nitrogen with magnetic stirring. Anhydrous solvents were transferred by oven-dried syringe. Anhydrous toluene, THF, diethyl ether and dioxane were purchased from Aldrich and used as received.

Flash chromatography was performed with biotage system using Si 25 S/M cartridges. Analytical thin layer chromatography (TLC) was performed with EM Reagent 0.25 mm silica gel 60-F commercial silica gel plates. Visualization was accomplished with UV light and potassium permanganate stain, followed by heating.

LC/MS data were recorded by the Agilent 1100 series and Waters Micromass ZQ system.

<sup>1</sup>H nuclear magnetic resonance (NMR) spectra were recorded on Varian UI-500 (500 MHz) spectrometers. The chemical shifts are reported in PPM with CDCl<sub>3</sub> ( $\delta$ =7.24) or TMS ( $\delta$ =0.00) as the internal standard unless otherwise noted.

## General Procedures:

A (for  $\alpha$ -arylation): The solution of **10** (111 mg, 0.65 mmol) and *t*-butyl propionate (86 mg, 0.65 mmol) in 3 mL of toluene was degassed with nitrogen for 5 min. To this solution at 0°C was slowly added NaHMDS (1.3 mmol, 2.2 mL, 0.6 M in toluene). After 2 h, the resulting solution was warmed to rt and stirred for 12 h before the mixture was quenched with ammonium chloride aqueous solution (10 mL, 1 N). Extracted the mixture with ethyl acetate (20 mL x2). The organic layers were combined and concentrated *in vacuo*. The residue was purified by biotage eluting with 5-25% ethyl acetate in hexanes to give **14** (156 mg, 0.59 mmol, 91%) as a colorless oil.

B (for tandem  $\alpha$ -arylation and  $\alpha$ -hydroxylation): The solution of **10** (111 mg, 0.65 mmol) and *t*-butyl propionate (86 mg, 0.65 mmol) in 3 mL of toluene was degassed with nitrogen for 5 min. To this solution at 0°C was slowly added NaHMDS (1.3 mmol, 2.2 mL, 0.6 M in toluene). The reaction mixture was warmed to rt and stirred under nitrogen. After 2 h, the the resulting solution was exposed to air for 12 h before the mixture was quenched with ammonium chloride aqueous solution (10 mL, 1 N). Extracted the mixture with ethyl acetate (20 mL x2). The organic layers were combined and concentrated *in vacuo*. The residue was purified by biotage eluting with 10-25% ethyl acetate in hexanes to give **15** (152 mg, 0.54 mmol, 84%) as a colorless oil.

A medium scale reaction (Preparation of compound **9**): The solution of **8** (1.00 g, 5.09 mmol) and *t*-butyl propionate (1.77 g, 2.1 mL, 15.3 mmol) in 20 mL of toluene was degassed with nitrogen for 5 min. To this solution at 0°C was slowly added NaHMDS (25.5 mL, 15.3 mmol, 0.6 M in toluene). After 5 h, the resulting solution was warmed to rt and stirred for 12 h before the mixture was quenched with ammonium chloride aqueous solution (50 mL, 1 N). Extracted the mixture with ethyl acetate (200 mL x2). The organic layers were combined and concentrated *in vacuo*. The residue was purified by biotage eluting with 5-15% ethyl acetate in hexanes to give **9** (1.11 g, 4.02 mmol, 79%) as a colorless oil.

Appendix: (The H-NMR and LC/MS of new compounds)

MR Spectrum: H1  
Instrument: Varian inova500  
Solvent: CDCl3 Temp: 25.0  
SID: shenbo Date: Nov 10 2005

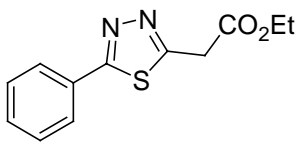

3

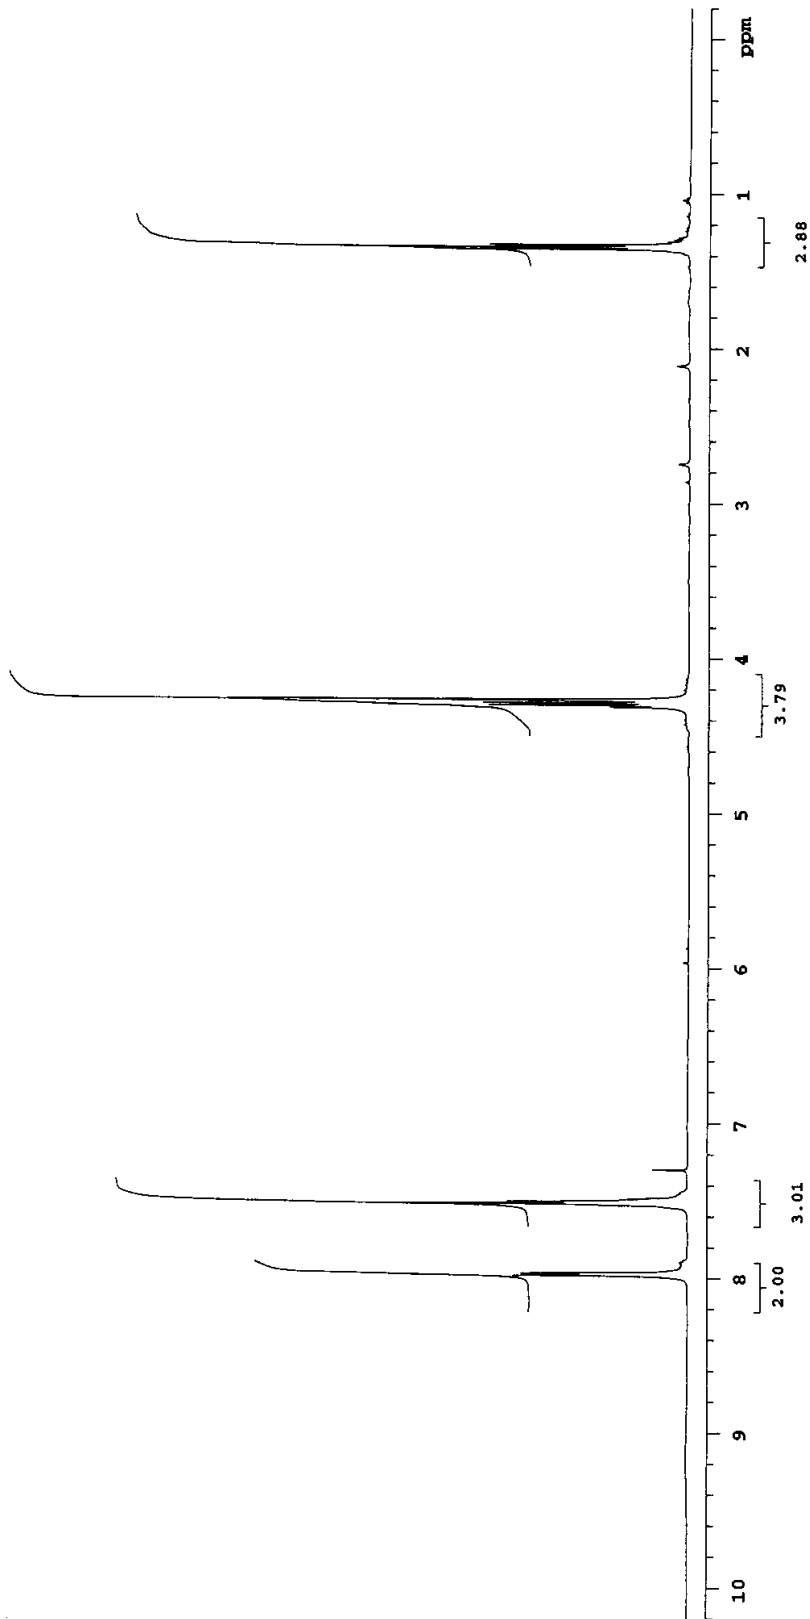

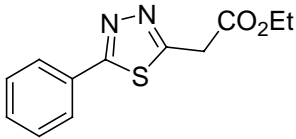

3

emistry Open Access LC/MS Report  
 D:\V8007\_2838-1  
 Nov-2005  
 X:\MassLynx\LC2M\_Low\_Pos.0lp

Instrument:  
 Time: 15:41:23

Basic Chemistry Open Access LC/MS Report  
 Sample ID: V8007\_2838-1  
 Date: 07-Nov-2005  
 Method: C:\MassLynx\LC2M\_Low\_Pos.0lp

Submitter: Shen, Hong x1755 (SHENHO)  
 Filename: 20058007003467

Page 2

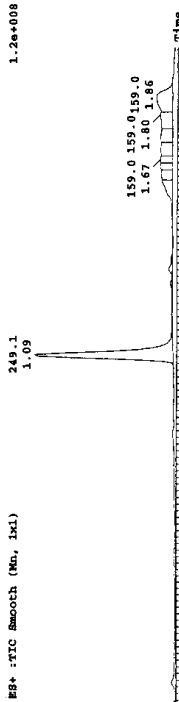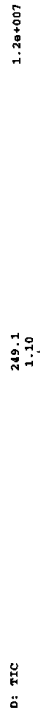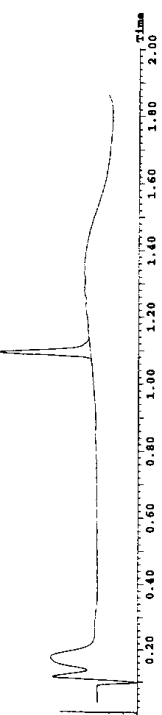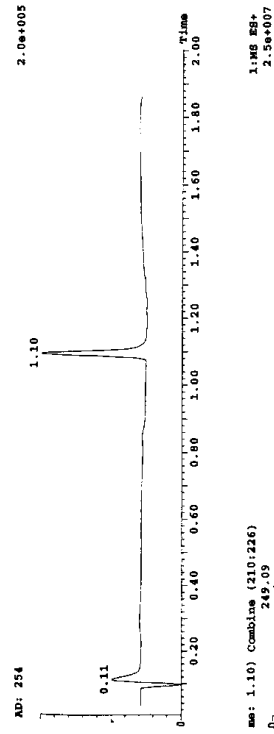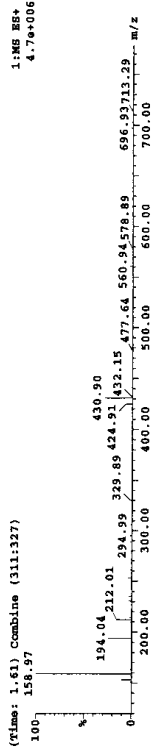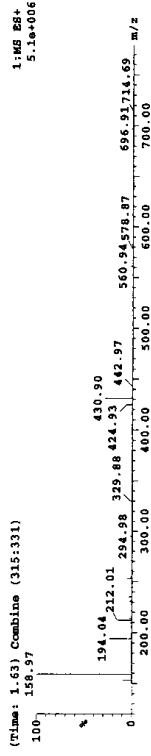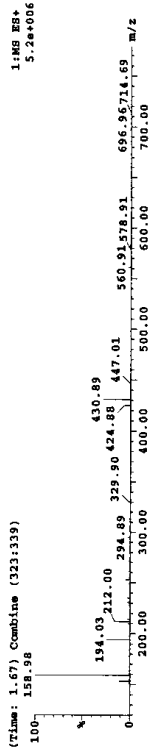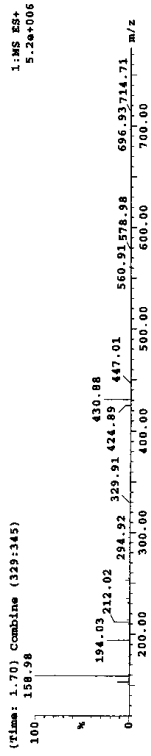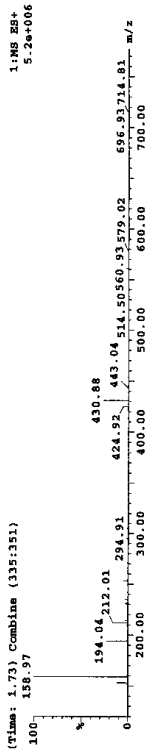

NMR Spectrum: H1  
Instrument: Varian inova500  
Solvent: CDCl3 Temp: 25.0  
ISID: sbenhc Date: Nov 17 2005

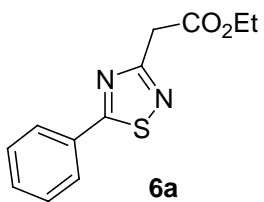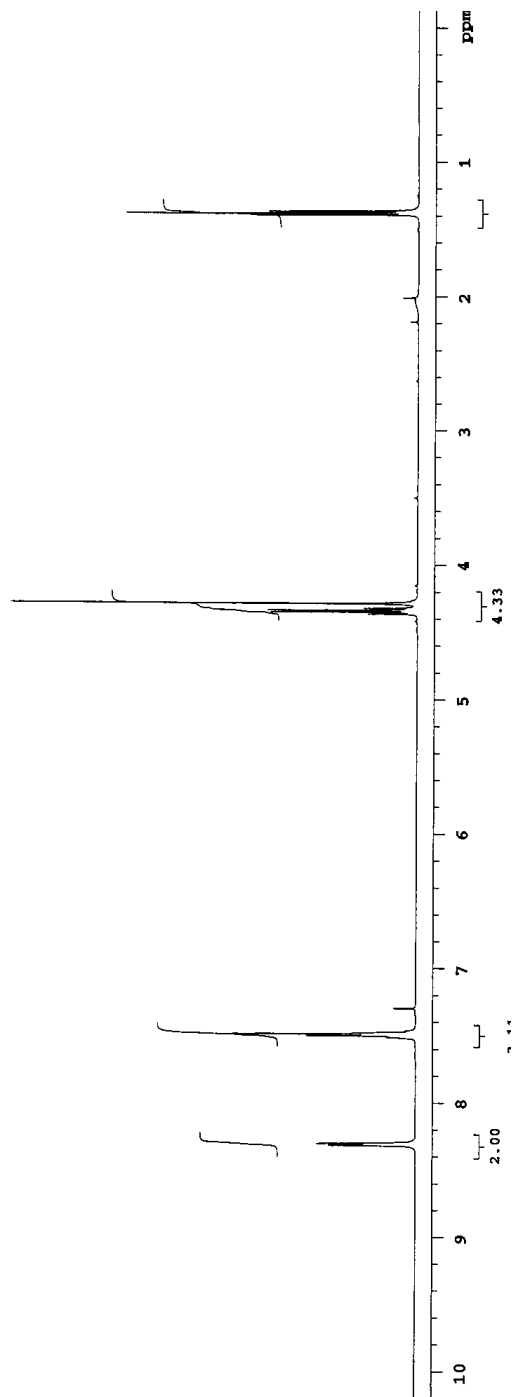

Sample ID: 2

Instrument:   
 Time: 13:35:23

Submitter: Shen, Hong x1755 (SHENHO)   
 Filename: RY800\_04\_0006744

Method: C:\MassLynx\LC2M\_Low\_Pos.olp

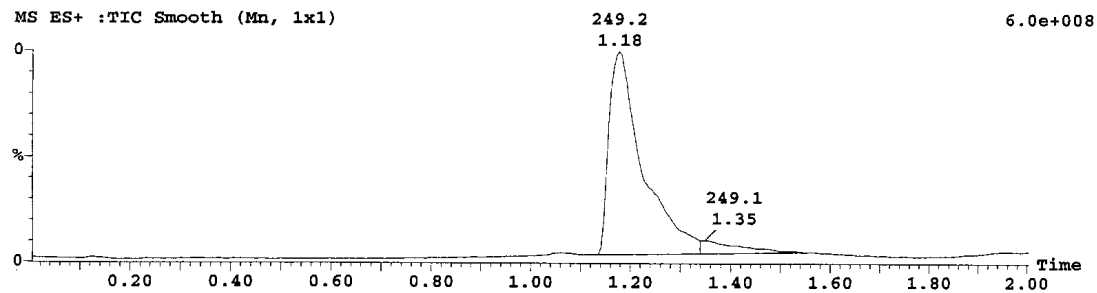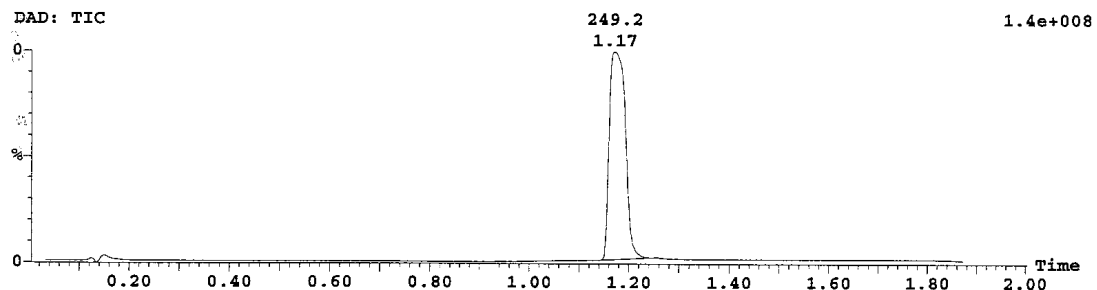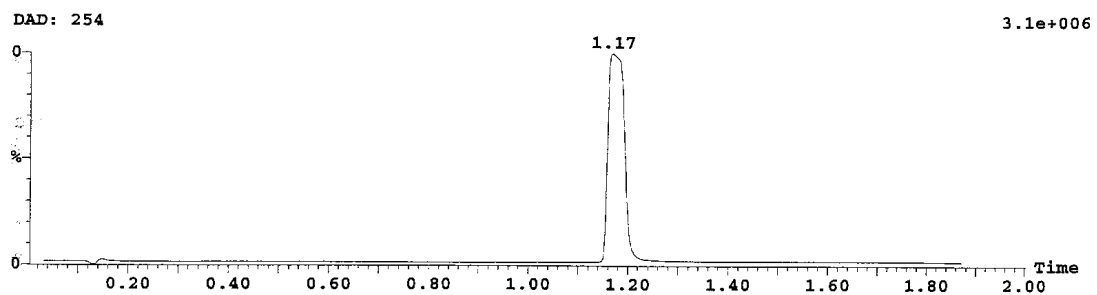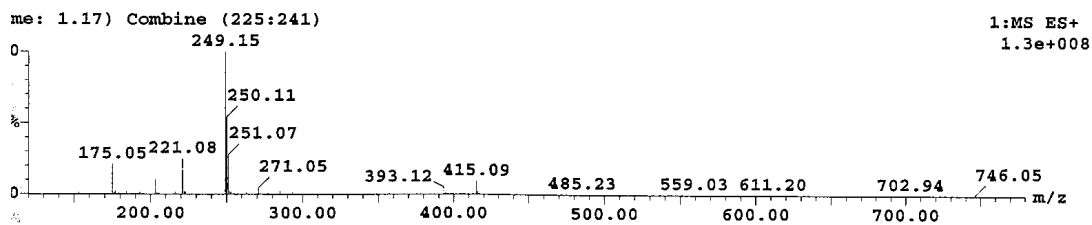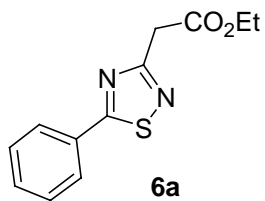

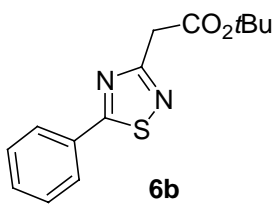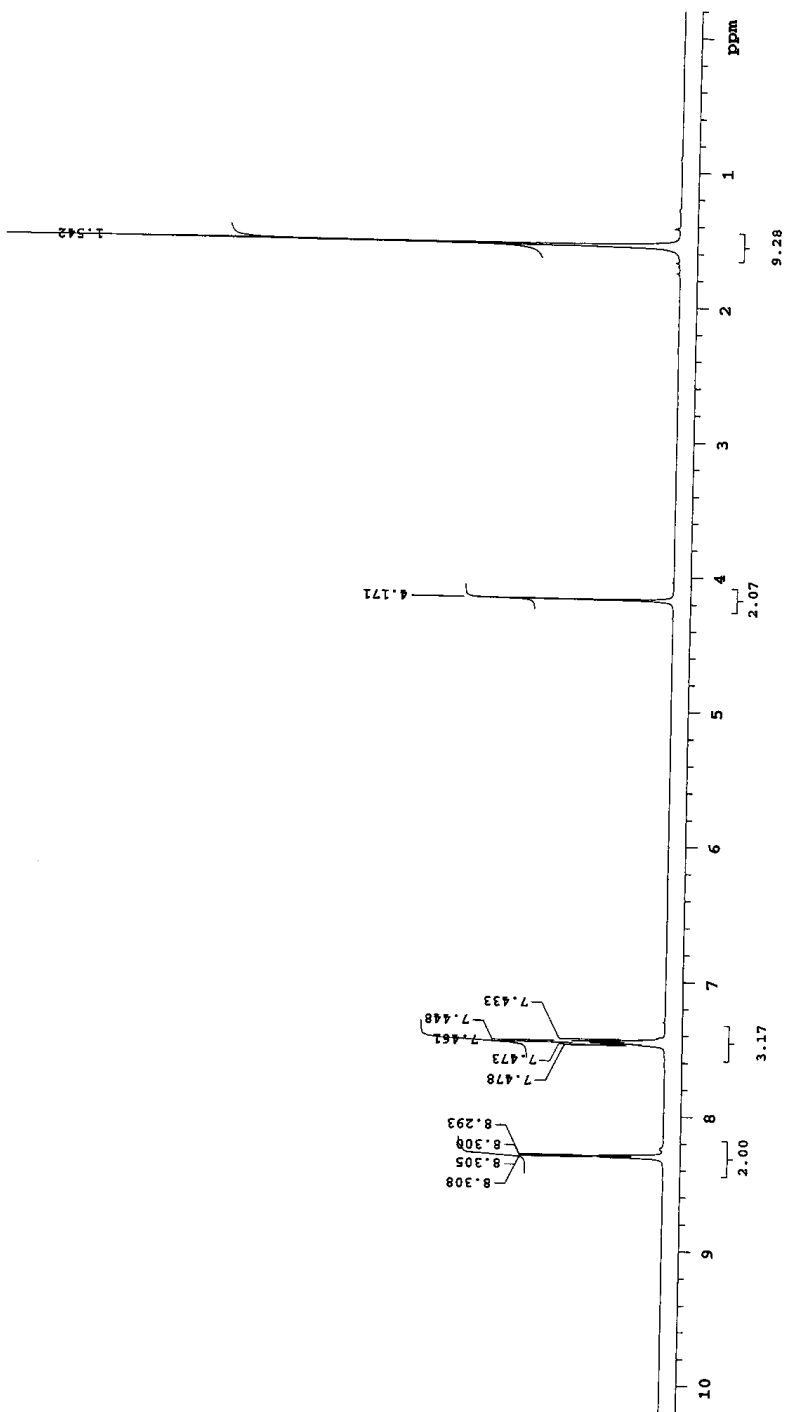

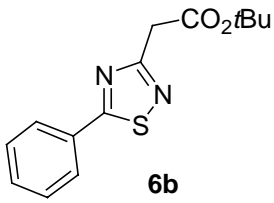

lc Chemistry Open Access LC/MS Report  
 Sample ID: FV800\_005084-1  
 Date: 09/31/01  
 Instrument: Time 09:31:01  
 Submitter: Shen, Hong x1755 (SHENHO)  
 Filename: FV800\_04\_0005087

Page 1

MS ES+ 171C Smooth (Hz, 1s1)

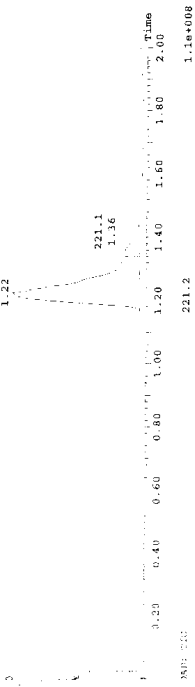

AD: 254

MS ES+ 234:250

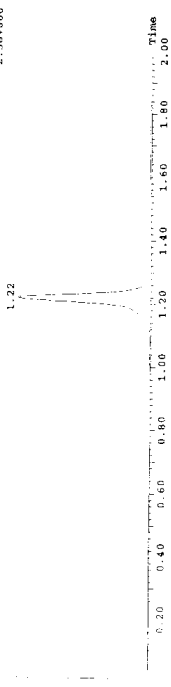

MS ES+ 1.28\*008

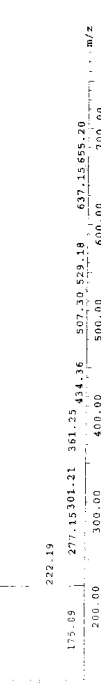

lc Chemistry Open Access LC/MS Report  
 Sample ID: FV800\_005084-1  
 Date: 14 Nov 2005  
 Instrument: Time 09:31:01  
 Submitter: Shen, Hong x1755 (SHENHO)  
 Filename: FV800\_04\_0006067

Page 2

MS ES+ 1.36: Combina (262:278)

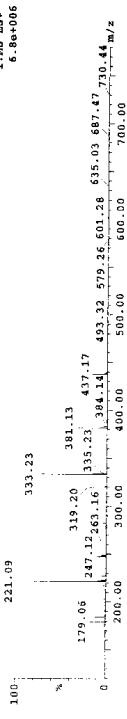

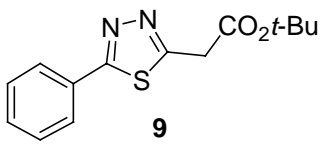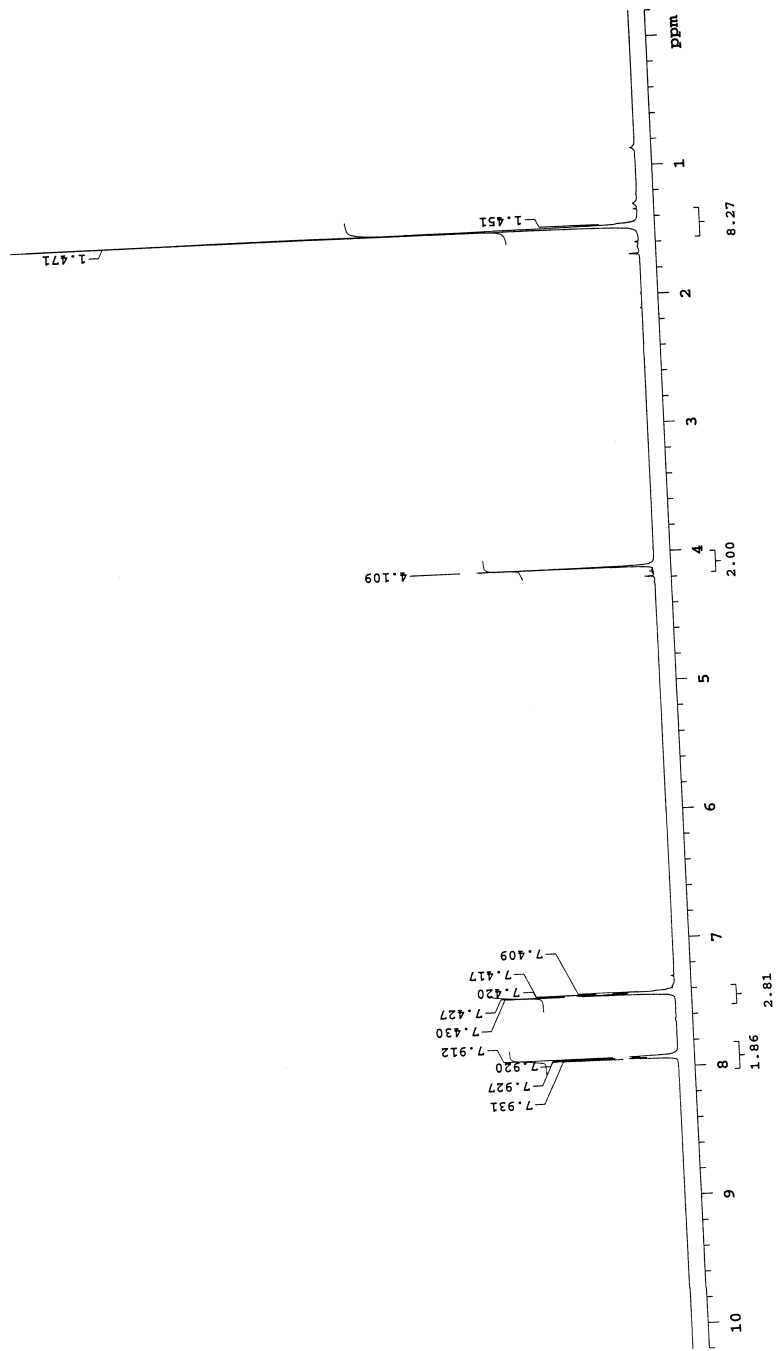



Sample ID: RY8004\_005199-1  
Date: 17-Nov-2005  
Path: C:\MassLynx\LC2M\_Low\_Pos.olg

Instrument:  
Time: 13:28:35

Submitter: Shen, Hong x1755 (SHENHO)  
Filename: RY800\_04\_0006742

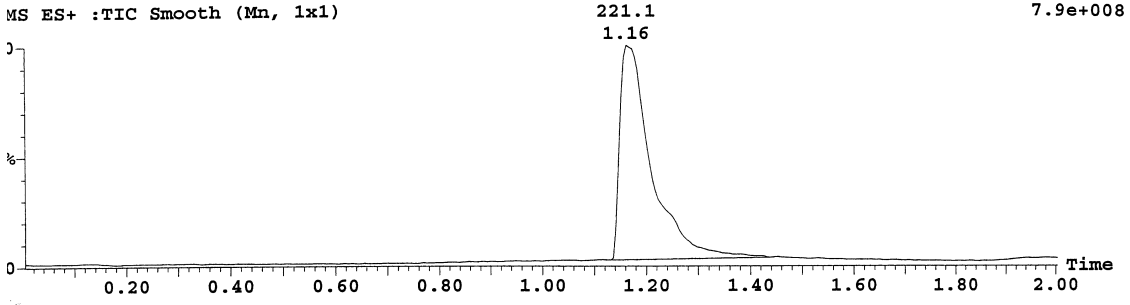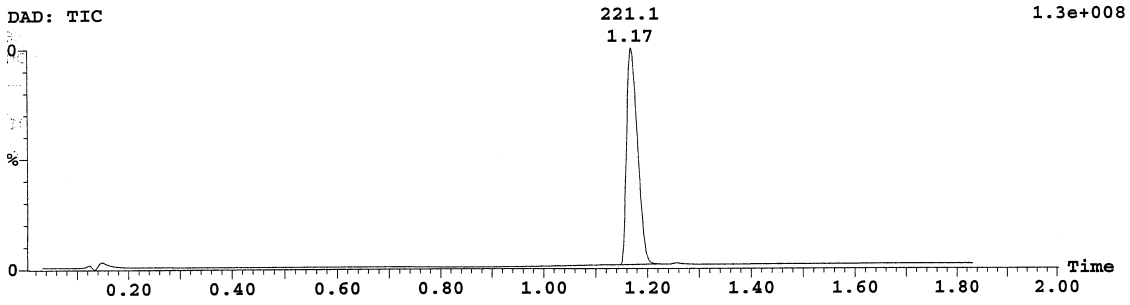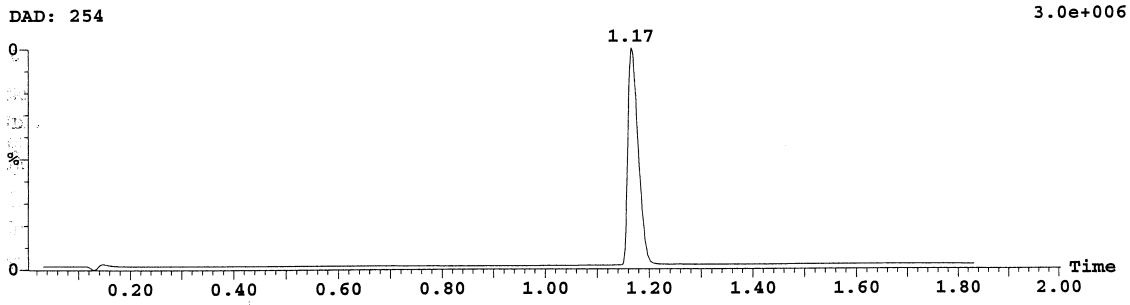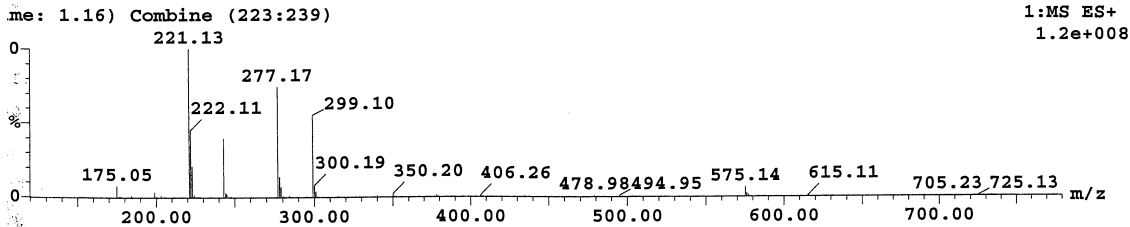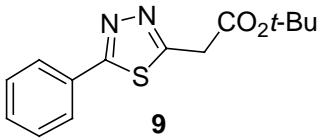

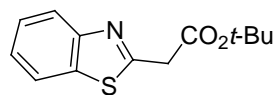

11

NMR Spectrum: H1  
Instrument: Varian Inova500  
Solvent: CDCl3 Temp: 25.0  
ISID: shenhc Date: Nov 22 2005

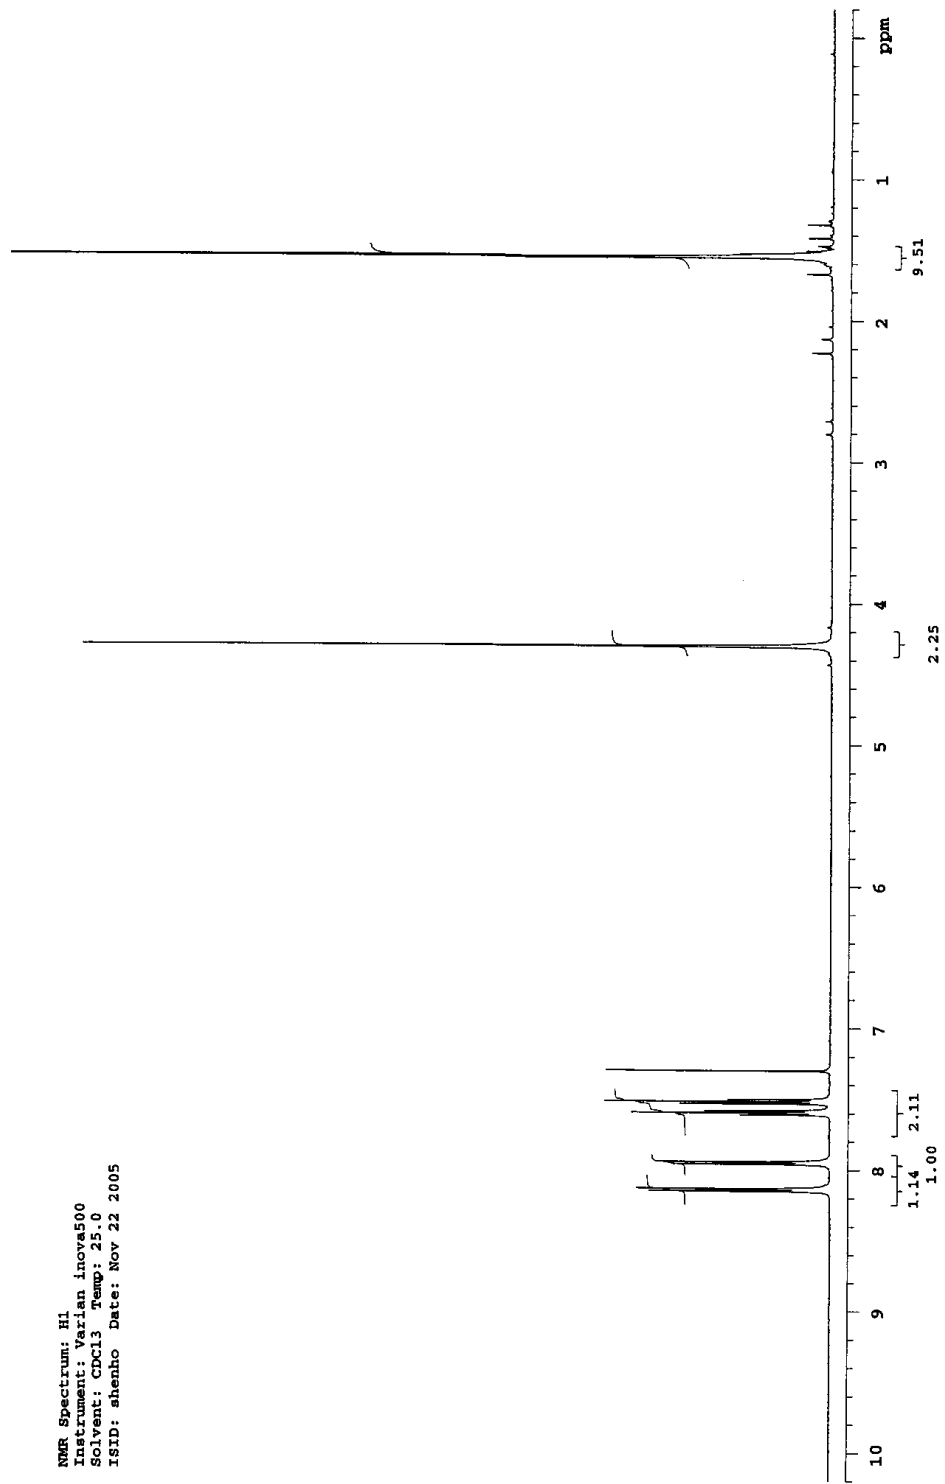

Sample ID: RY8004\_005290-1  
Date: 22-Nov-2005  
File: C:\MassLynx\LC2M\_Low\_Pos.olg

Instrument:  
Time: 15:40:32

Submitter: Shen, Hong x1755 (SHENHO)  
Filename: RY800\_04\_0006866

MS ES+ :TIC Smooth (Mn, 1x1) 5.9e+008

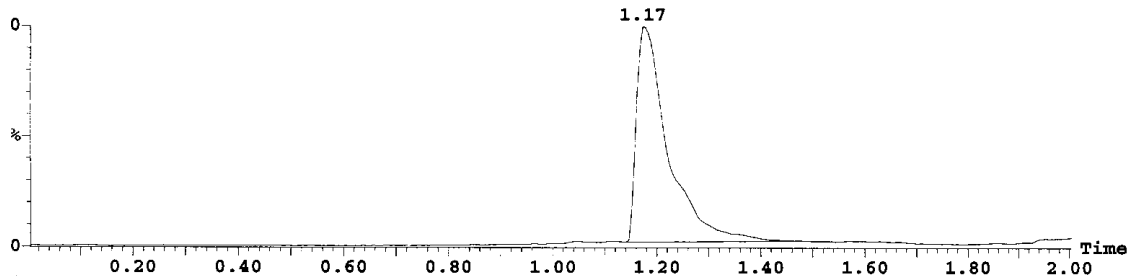

DAD: TIC 9.4e+007

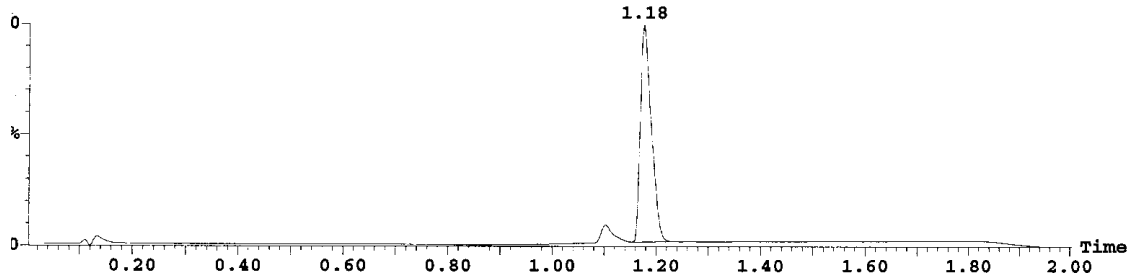

DAD: 254 2.3e+006

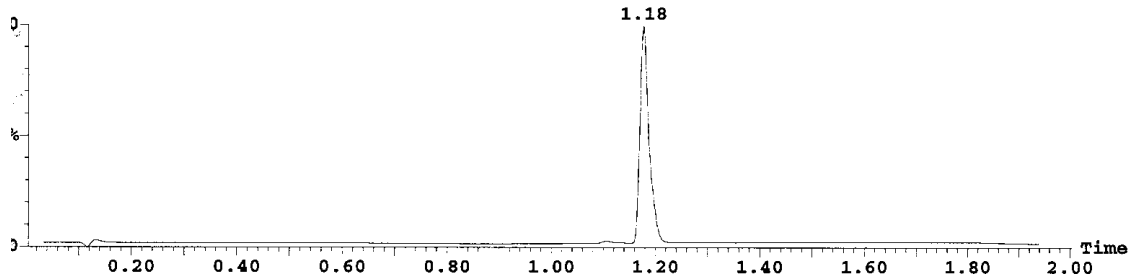

File: 1.17) Combine (225:241)

1:MS ES+  
1.3e+008

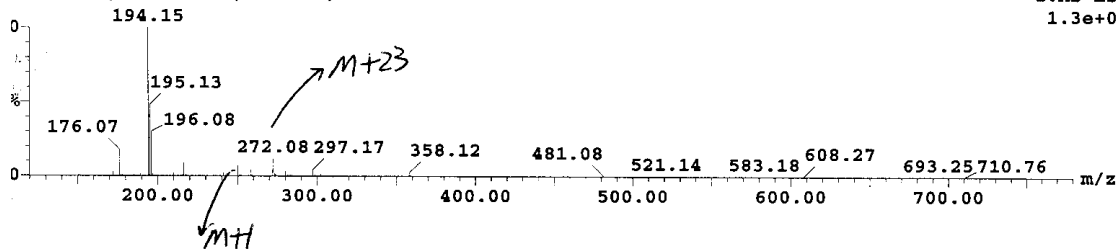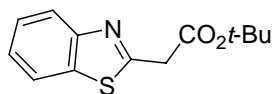

11

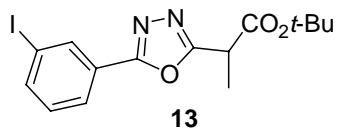

NMR Spectrum: H1  
 Instrument: Varian inova500  
 Solvent: CDCl3 Temp: 25.0  
 FSID: shenbo Date: Jan 13 2006

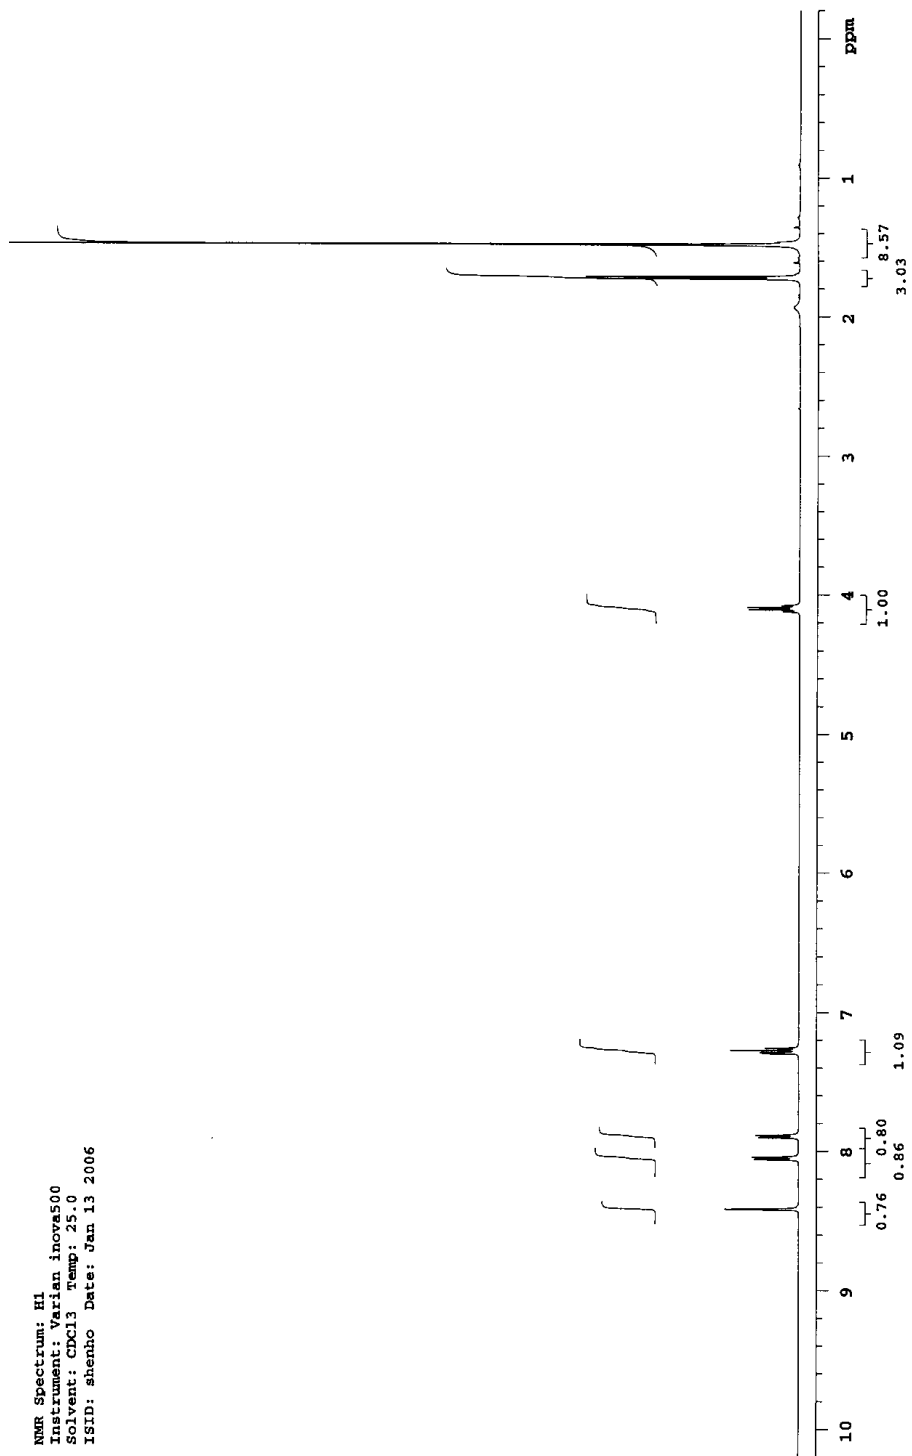

MS ES+ : TIC Smooth (Mn, 1x1) 345.0 3.7e+008  
1.24

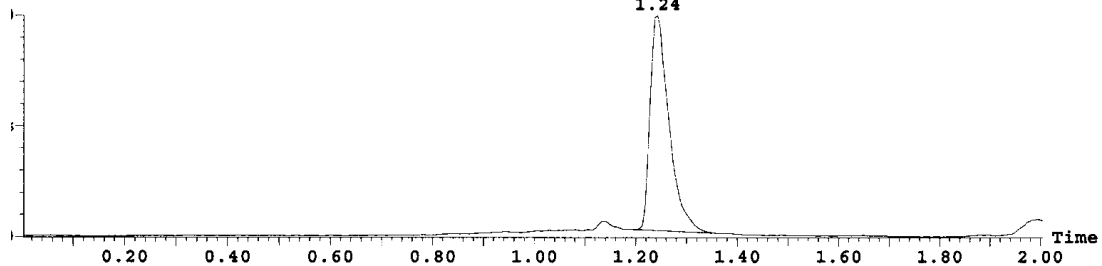

DAD: TIC 345.0 7.2e+007  
1.24

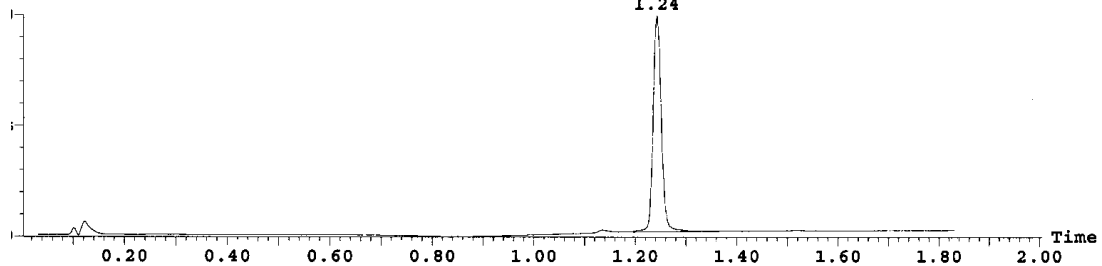

DAD: 254 1.24 1.9e+006

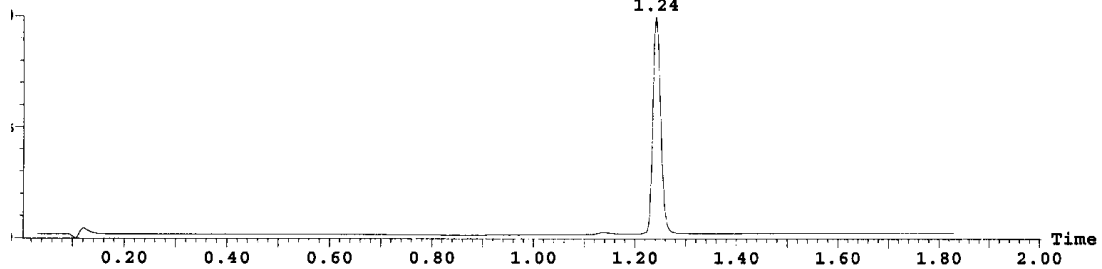

Scan: 1.24) Combine (239;255) 1:MS ES+ 6.4e+007

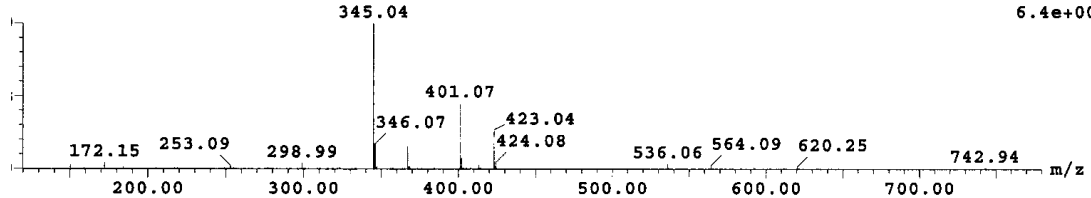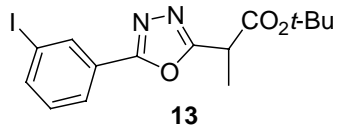

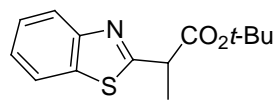

14

NMR Spectrum: H1  
Instrument: Varian inova500  
Solvent: CDCl3 Temp: 25.0  
ISID: shenho Date: Nov 29 2005

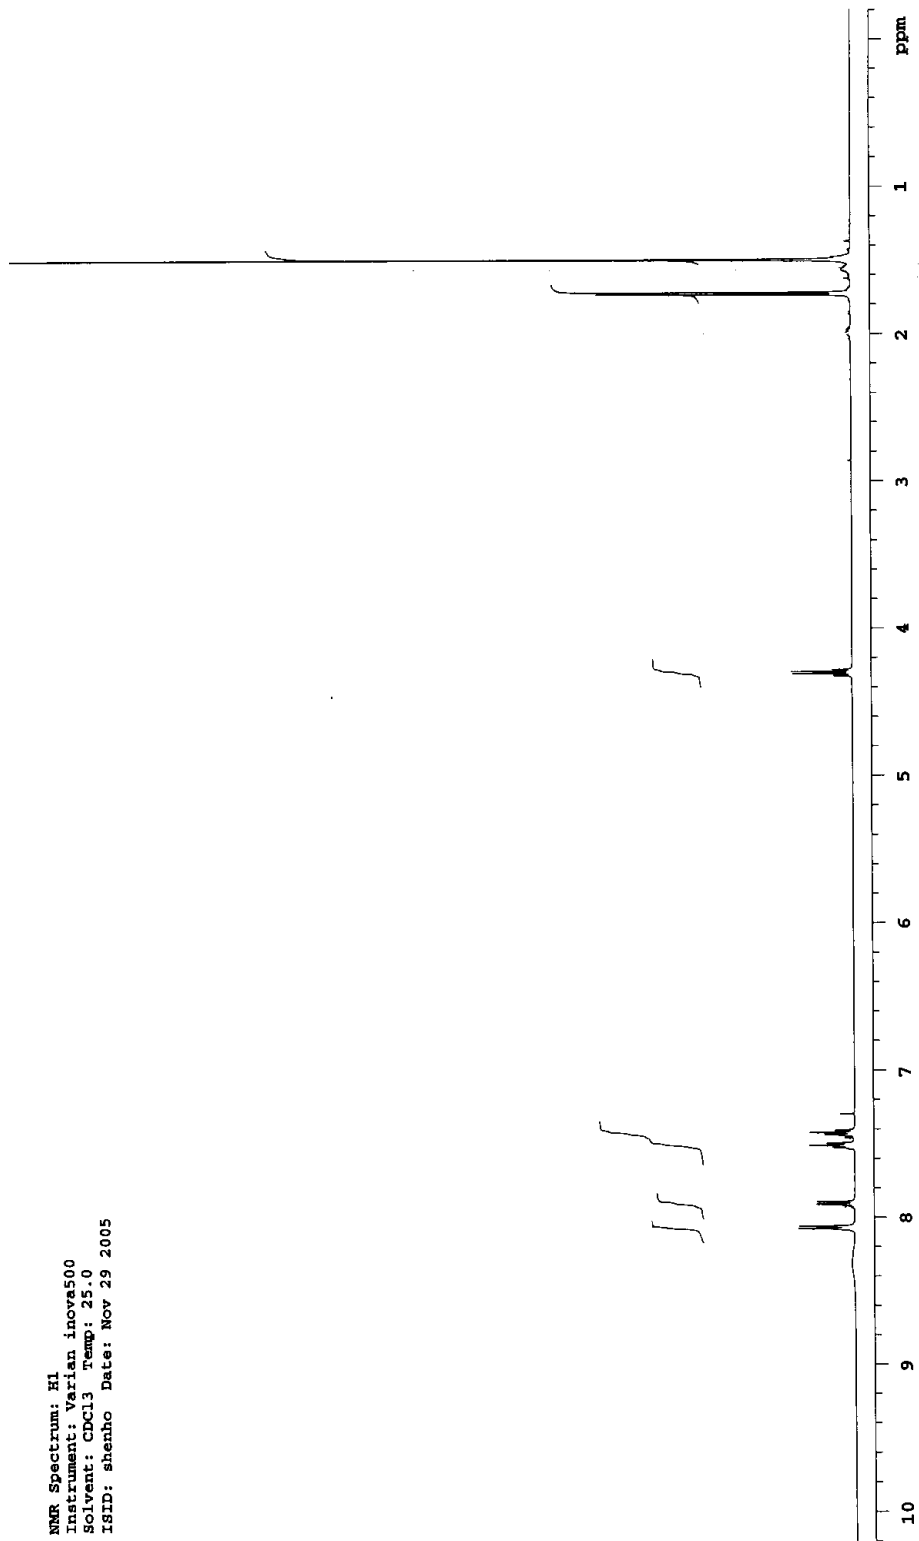

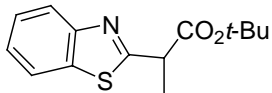

14

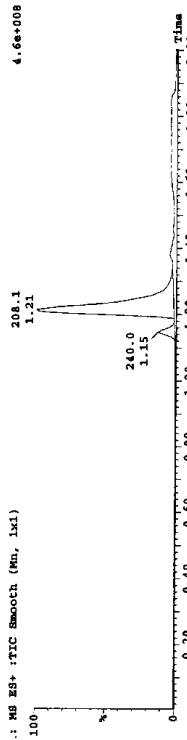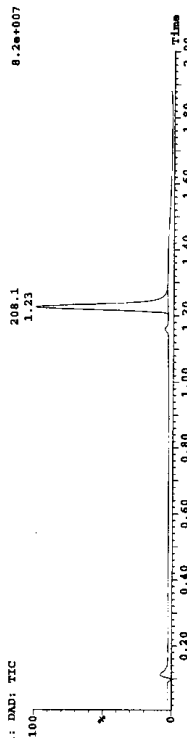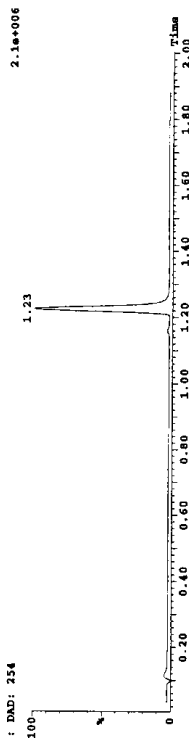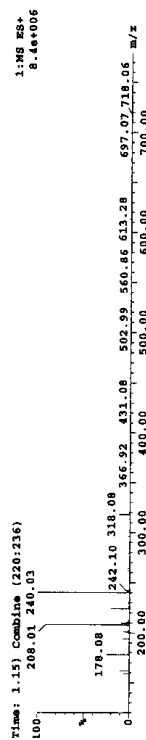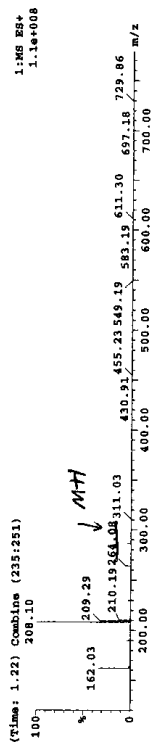

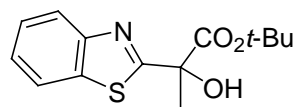

15

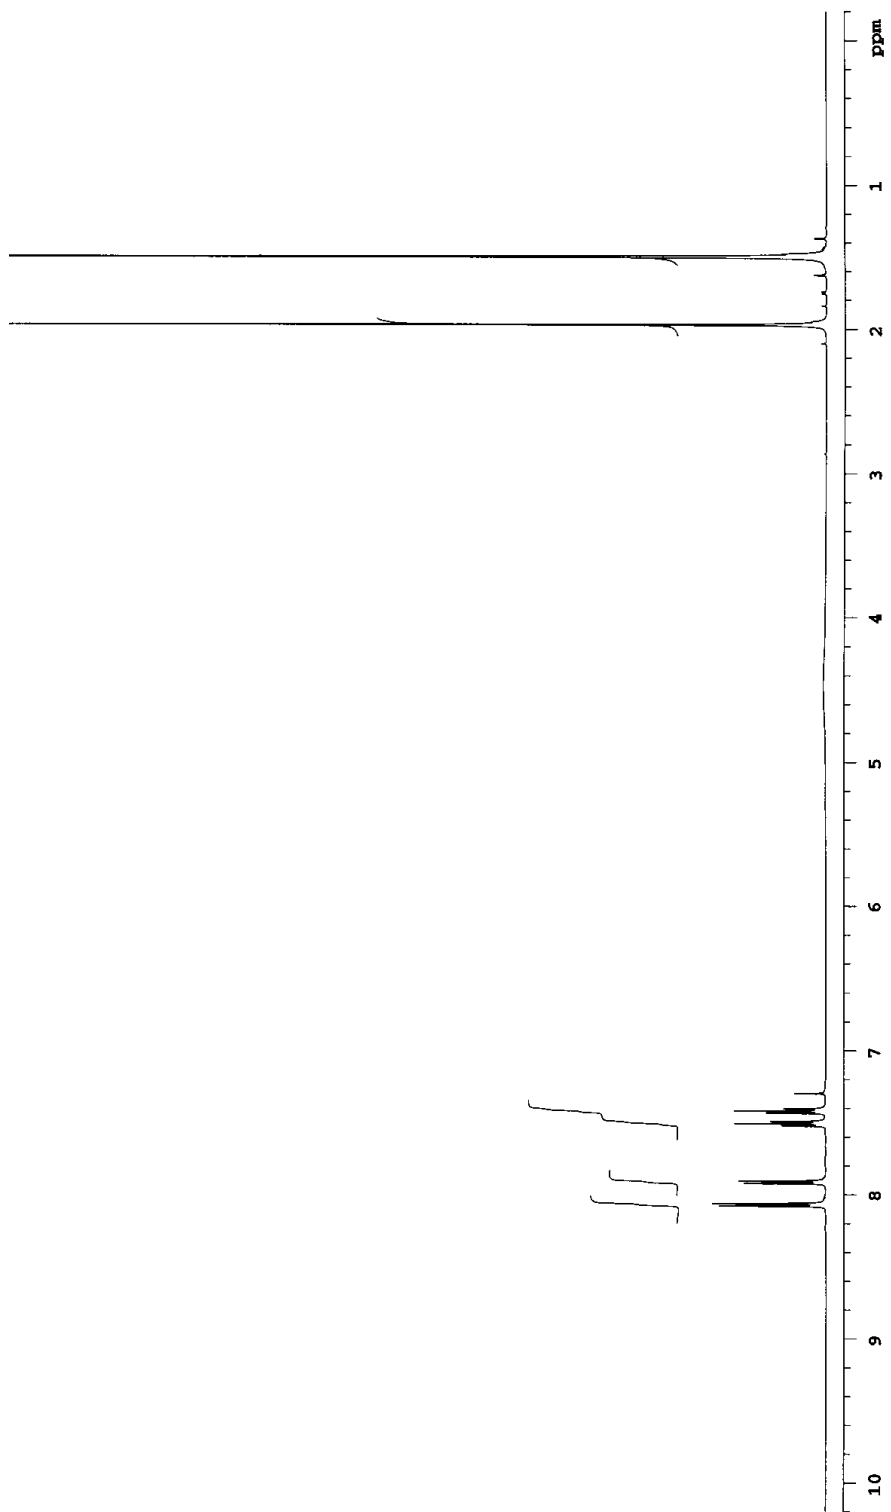



1: MS ES+ :TIC Smooth (Mn, 1x1)

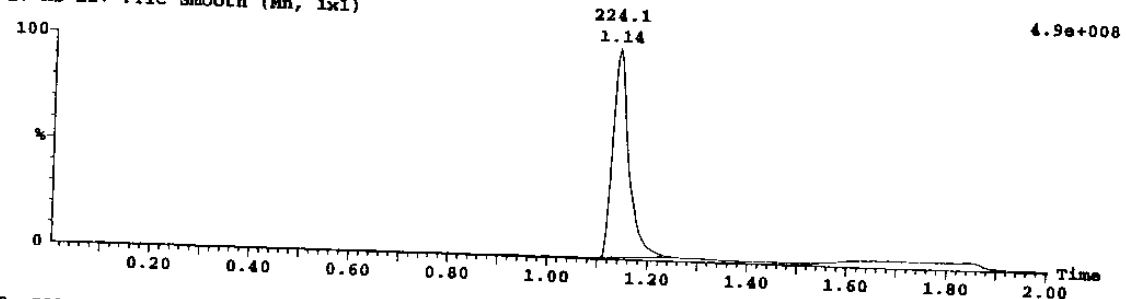

2: DAD: TIC

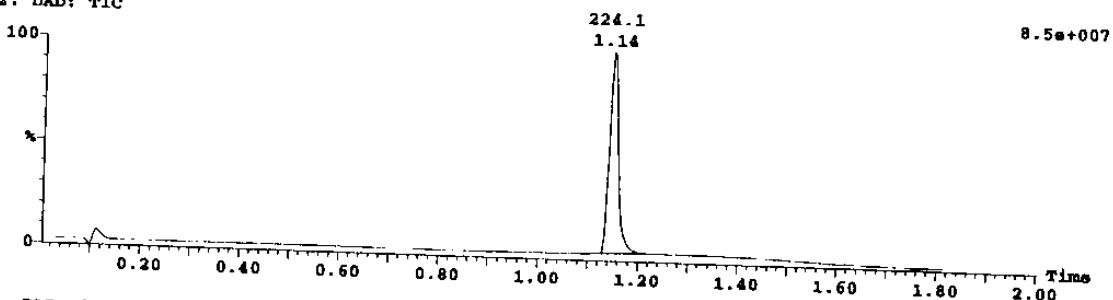

3: DAD: 254

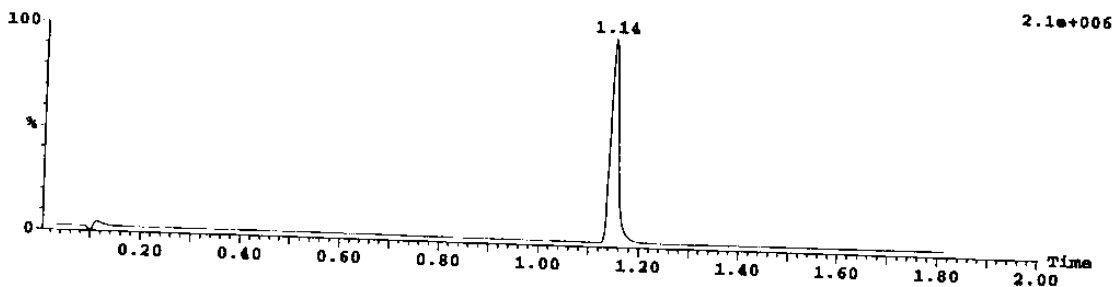

Time: 1.14) Combine (218:234)

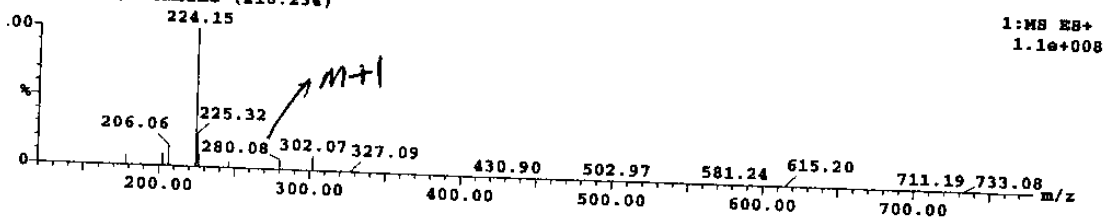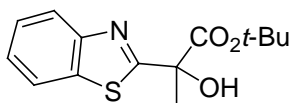

15

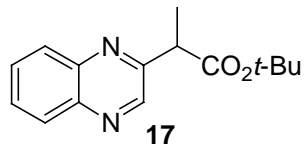

NMR Spectrum: H1  
Instrument: Varian inovo500  
Solvent: CDCl3 Temp: 25.0  
ISID: shenho Date: Dec 1 2005

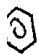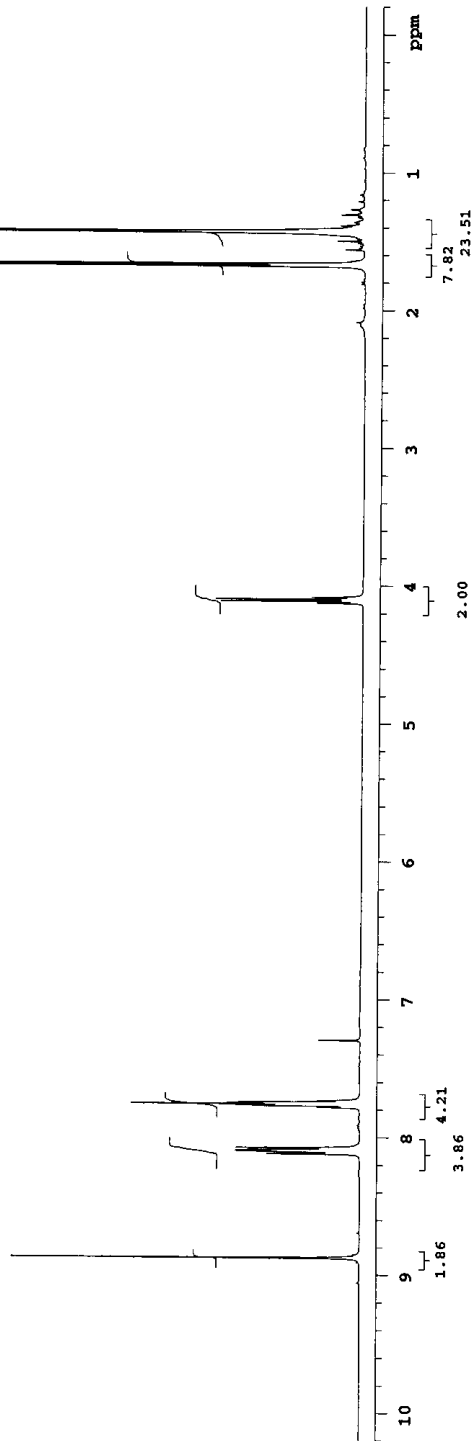

MS ES+ :TIC Smooth (Mn, 1x1)

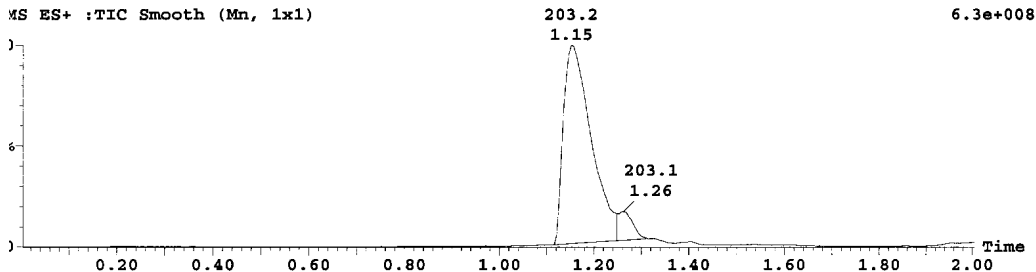

DAD: TIC

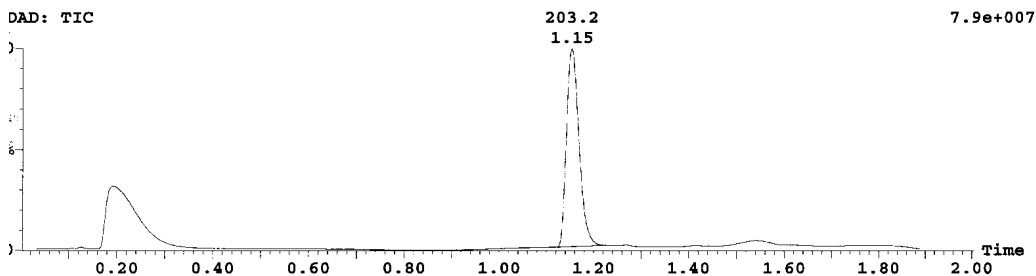

DAD: 254

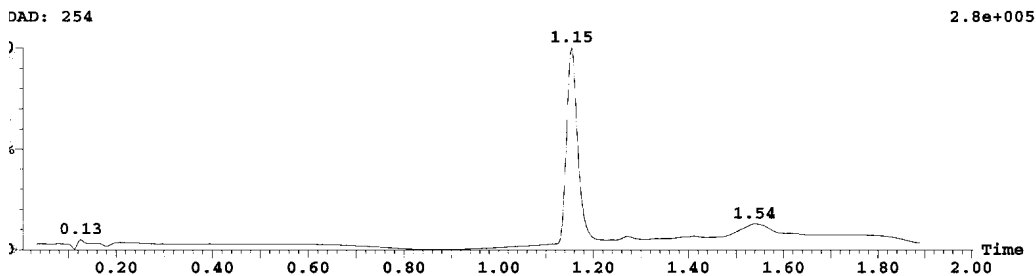

Scan: 1.15) Combine (222:237)

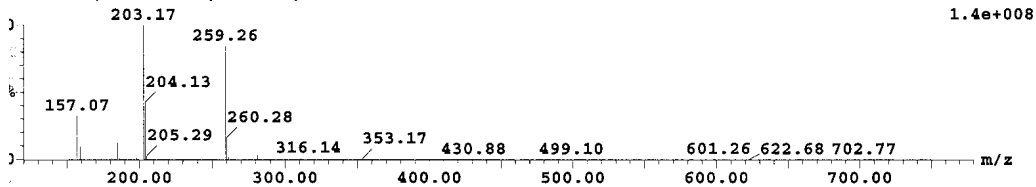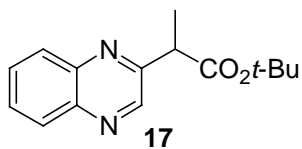

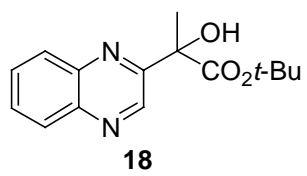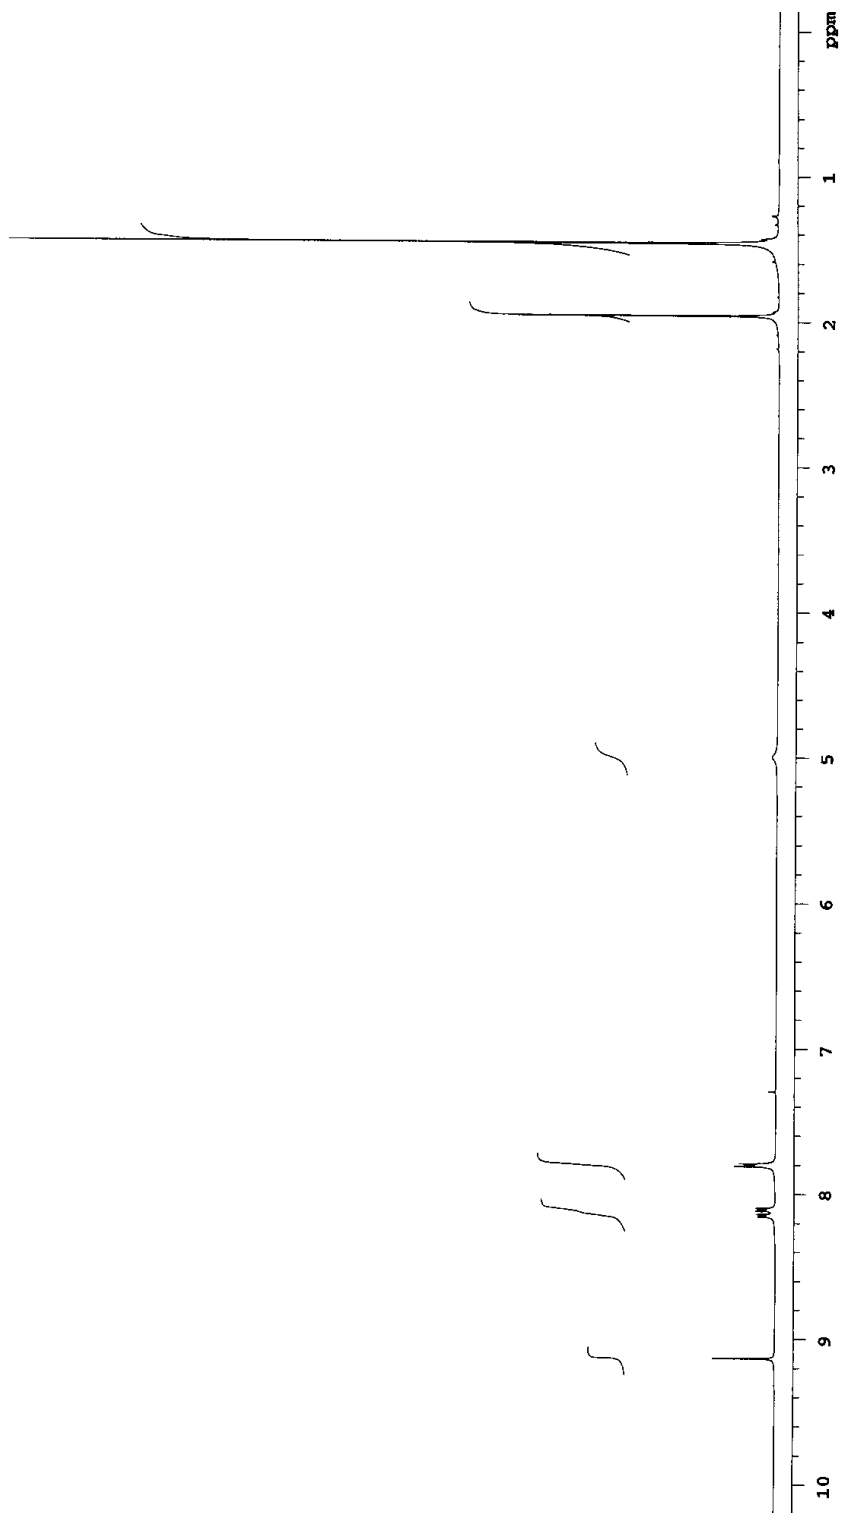

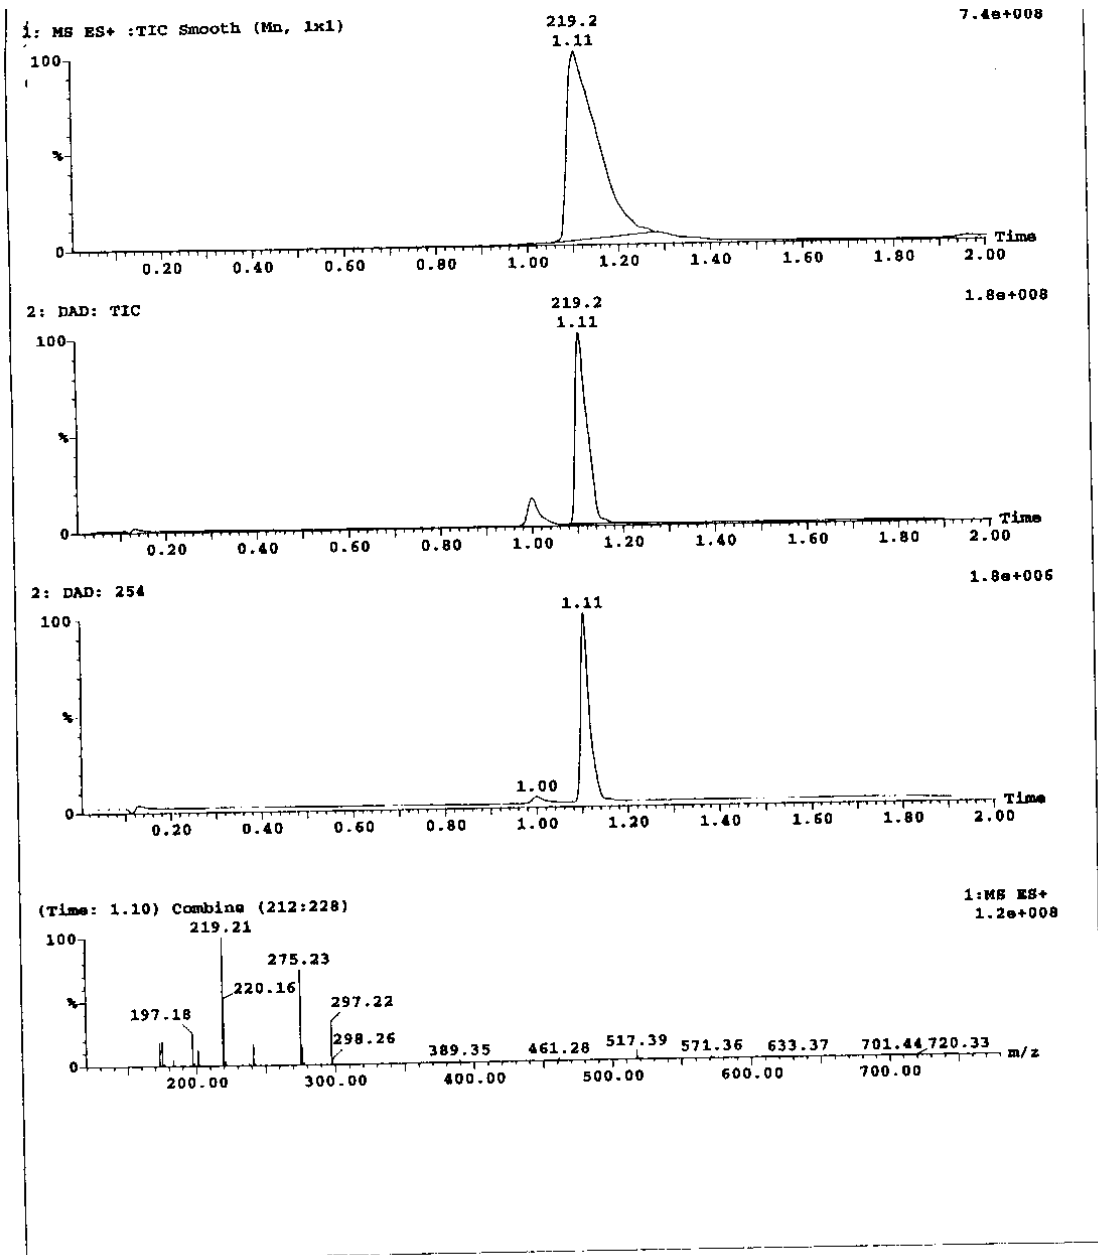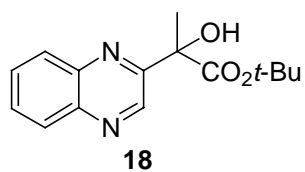

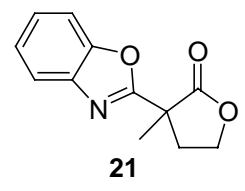

NMR Spectrum: H1  
 Instrument: Varian inovo500  
 Solvent: CDCl3 Temp: 25.0  
 ISID: shenbo Date: Nov 29 2005

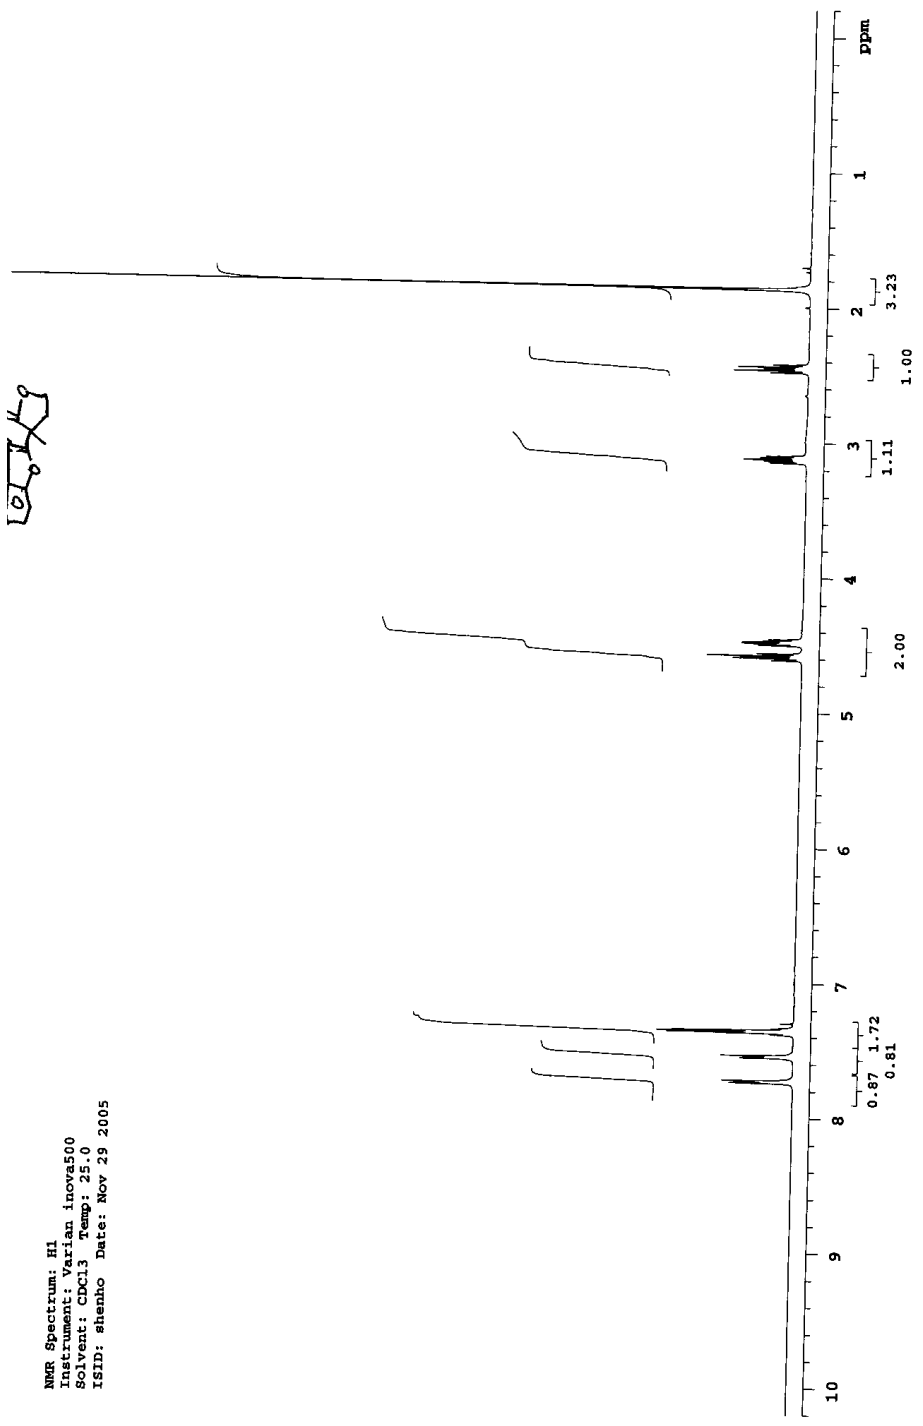

Sample ID: RY8007\_3172-1  
Date: 29-Nov-2005  
Path: C:\MassLynx\LC2M\_Low\_Pos.olg

Instrument:  
Time: 09:28:18

Submitter: Shen, Hong x1755 (SHENHO)  
Filename: 20058007003876

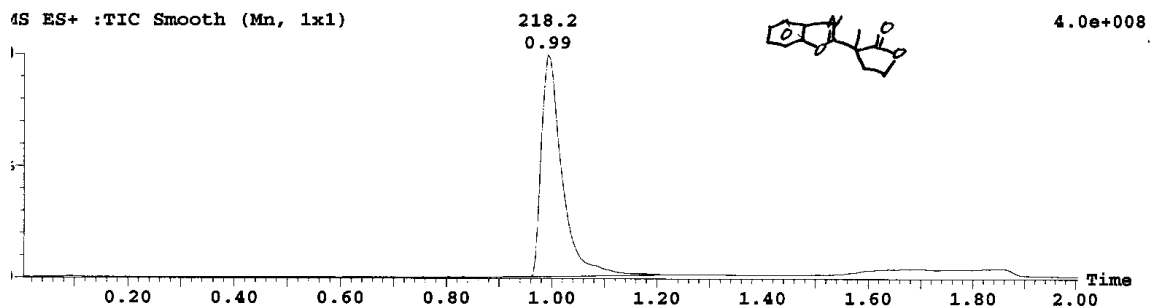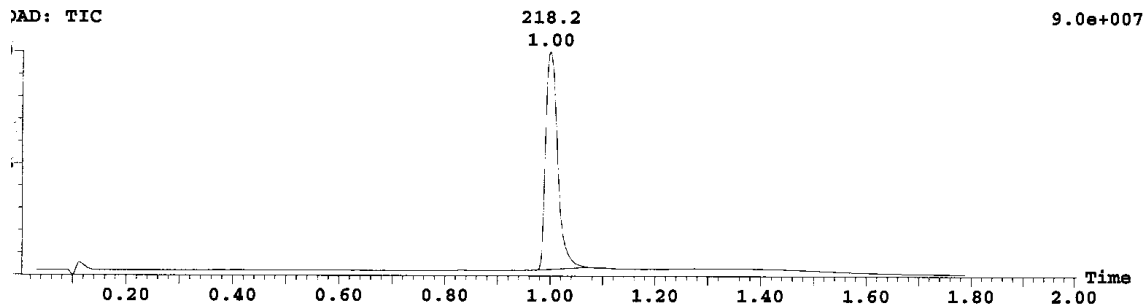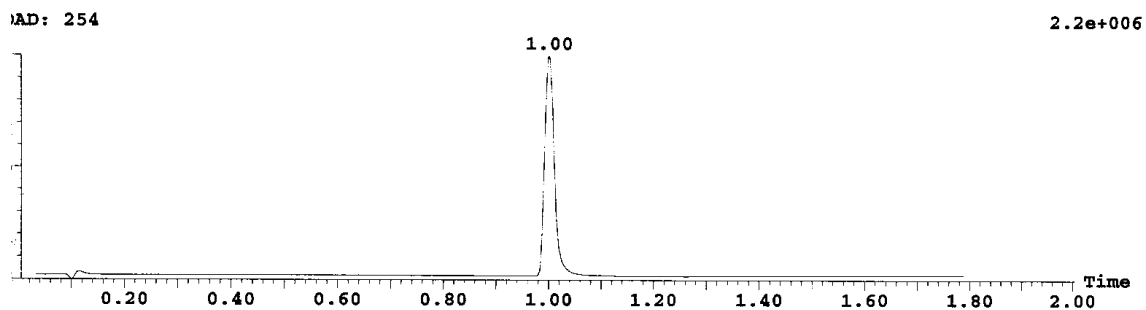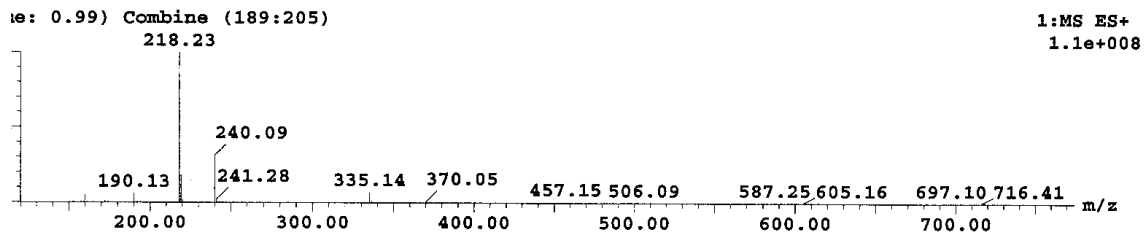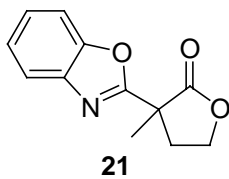

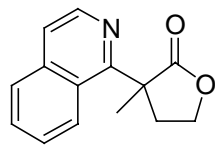

NMR Spectrum: H1  
Instrument: Varian inova500  
Solvent: CDCl3 Temp: 25.0  
ISID: shenho Date: Nov 29 2005

2

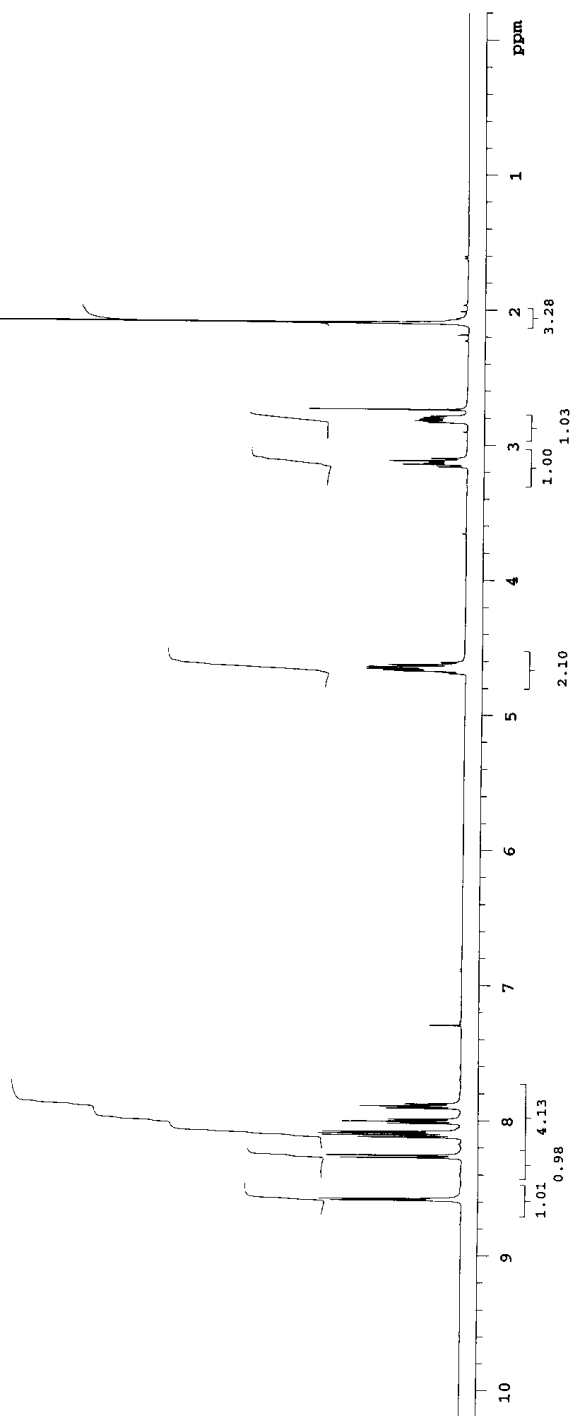



Sample ID: RY80010\_12611-1  
 Date: 29-Nov-2005

Instrument:  
 Time: 10:24:01

Submitter: Shen, Hong x1755 (SHENHO)  
 Filename: 200580010\_0015691

Path: C:\MassLynx\LC2M\_Low\_Pos.plp

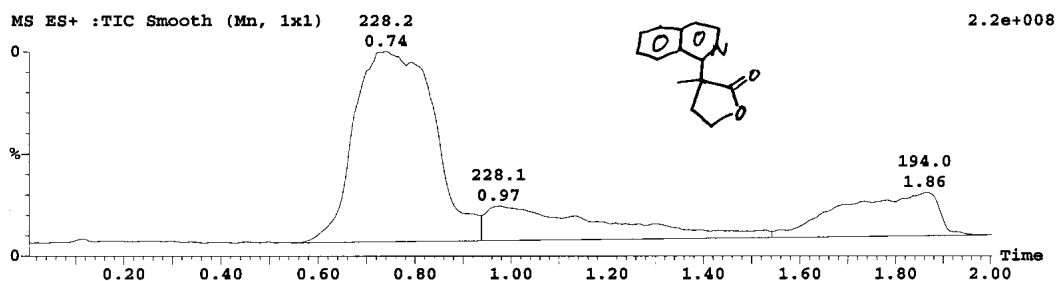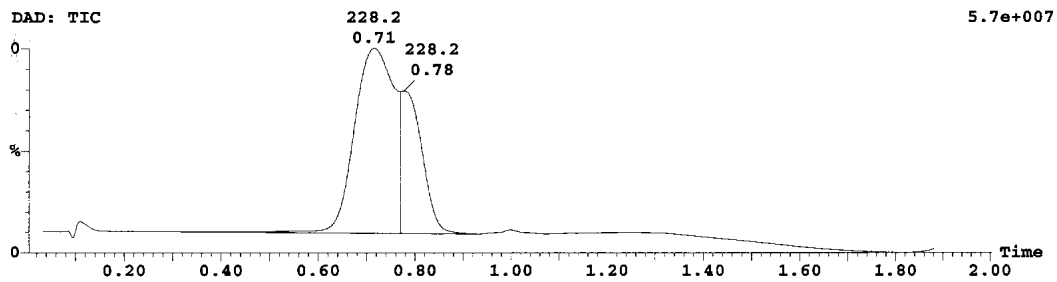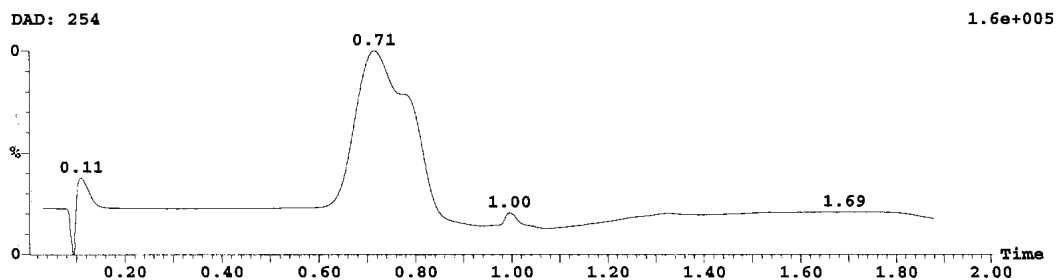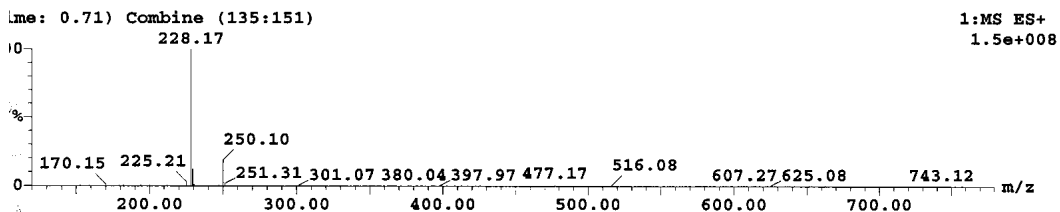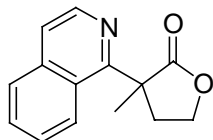

23

NMR Spectrum: H1  
Instrument: Varian inovo500  
Solvent: CDCl3 Temp: 25.0  
ISID: shenho Date: Dec 12 2005

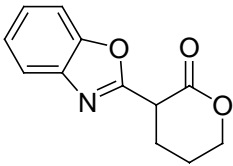

25

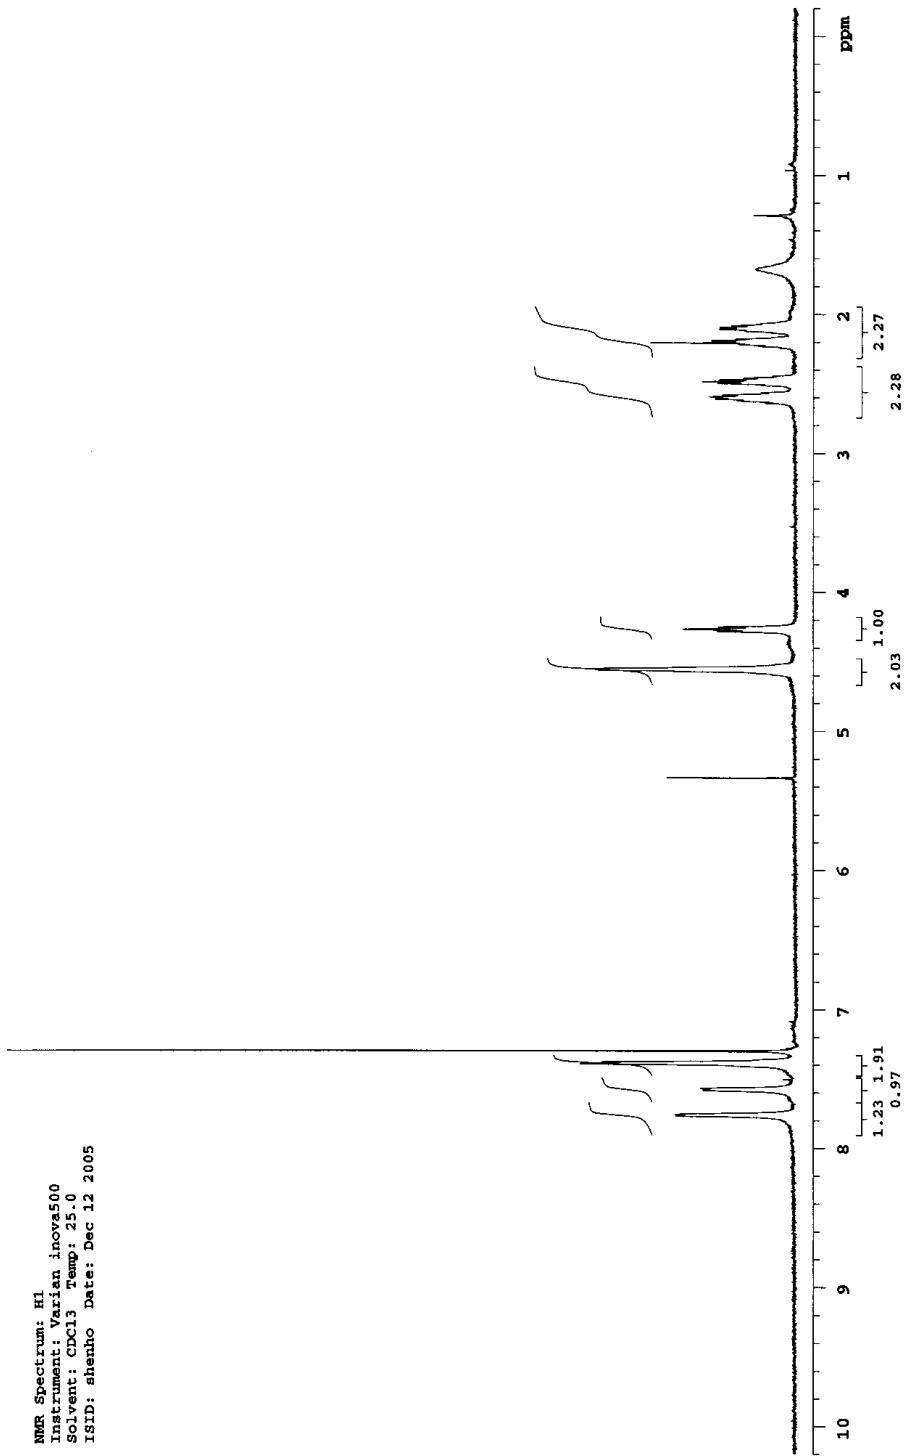

MS ES+ :TIC Smooth (Mn, 1x1) 218.2 0.97 4.6e+008

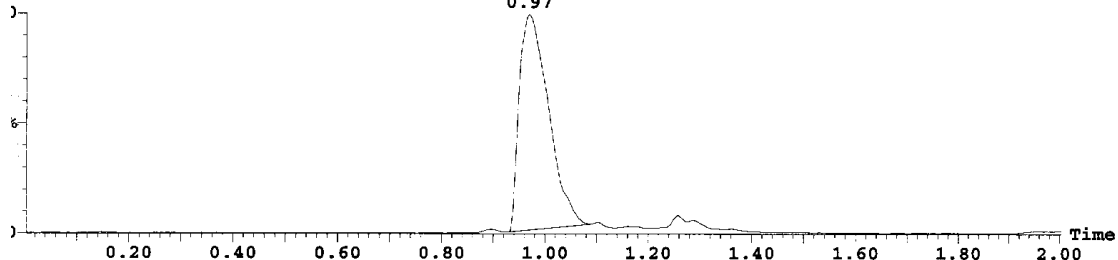

DAD: TIC 218.2 0.96 4.5e+007

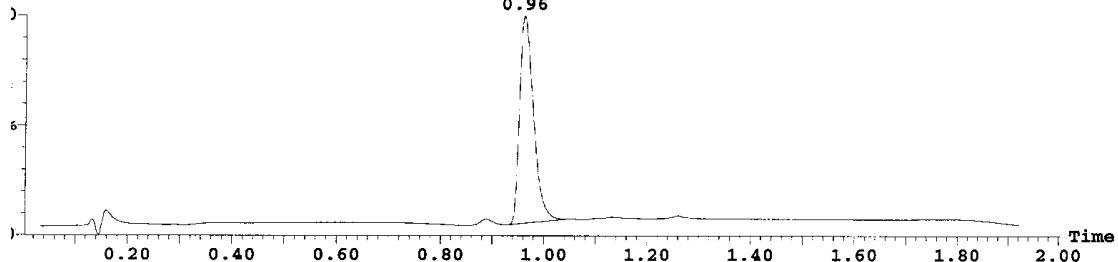

DAD: 254 0.96 3.8e+005

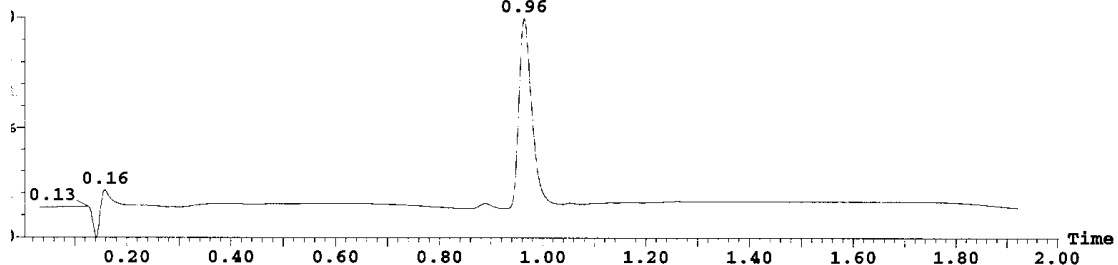

MS: 0.96) Combine (184:200) 218.20 240.09 190.09 241.22 345.71 376.08 457.11 489.03 587.07 608.98 690.22 706.14 1:MS ES+ 1.1e+008

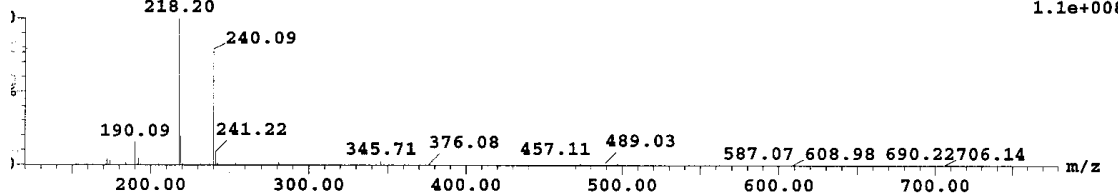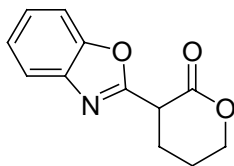

25

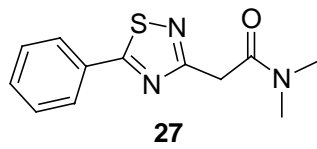

NMR Spectrum: H1  
Instrument: Varian inovo500  
Solvent: CDCl3 Temp: 25.0  
ISID: shenbo Date: Nov 17 2005

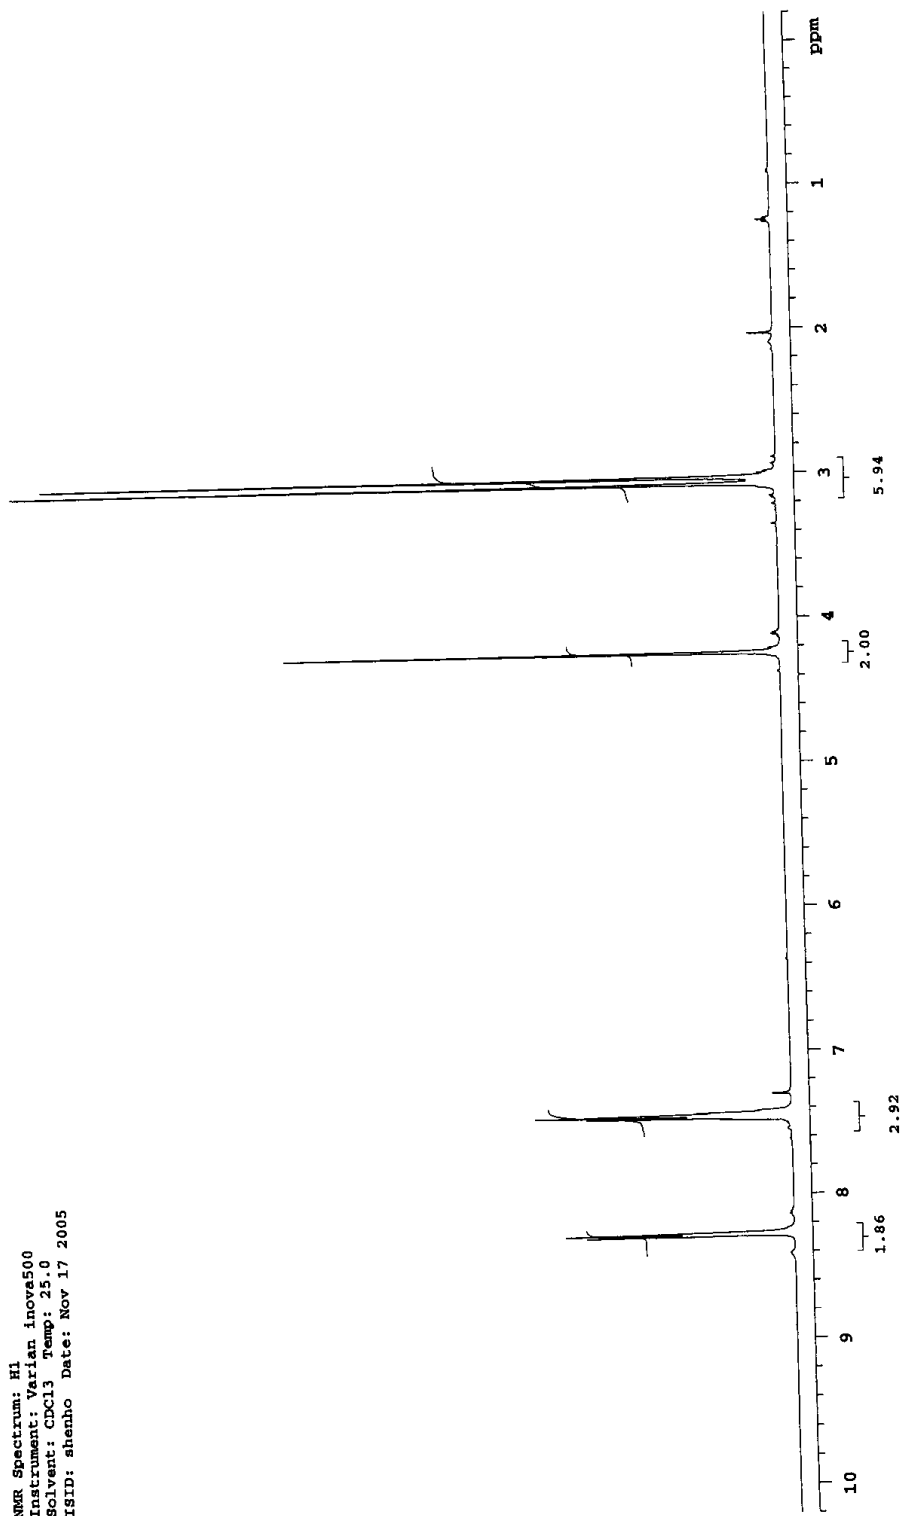

Sample ID: 1  
 Date: 17-Nov-2005  
 File: C:\MassLynx\LC2M\_Low\_Pos.olg

Instrument:  
 Time: 13:31:54

Submitter: Shen, Hong x1755 (SHENHO)  
 Filename: RY800\_04\_0006743

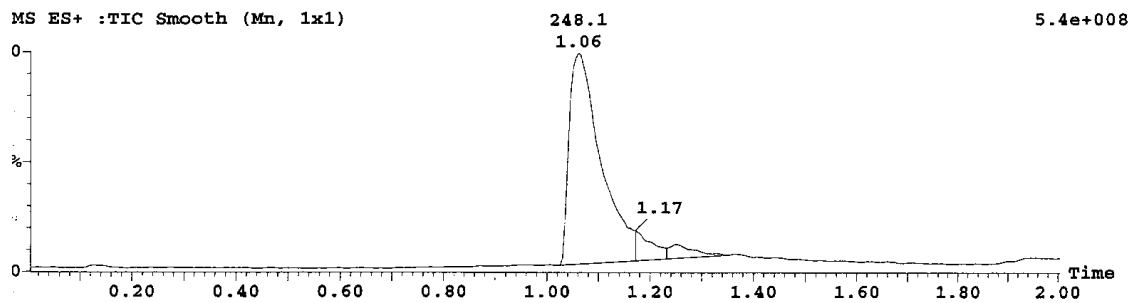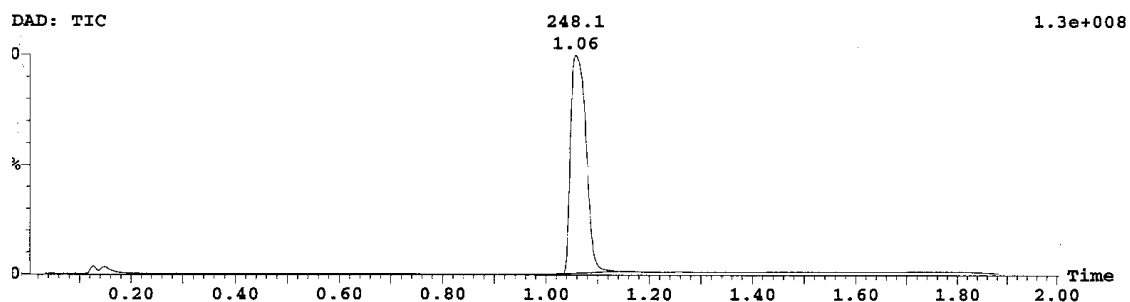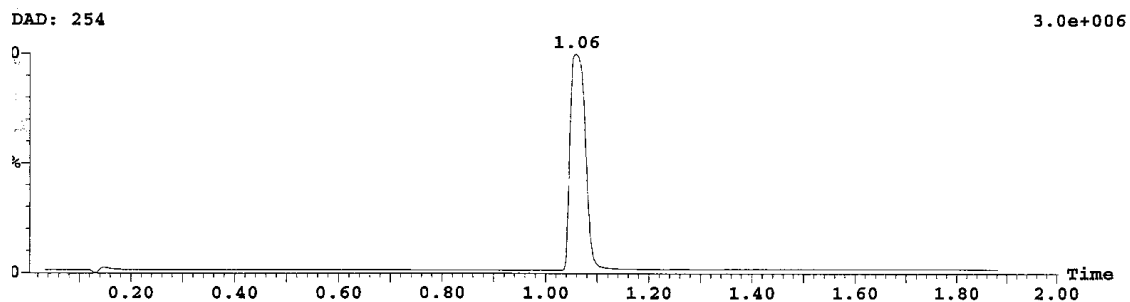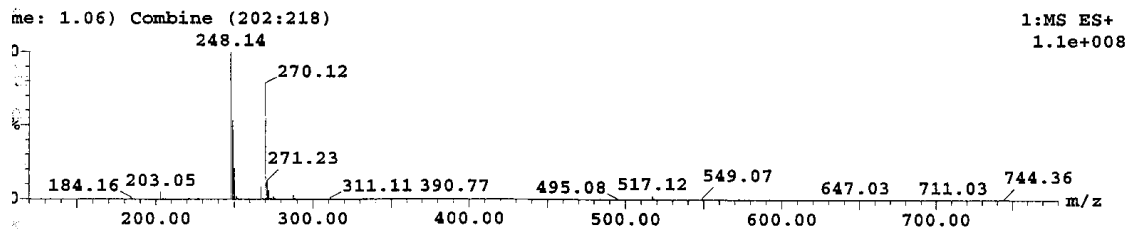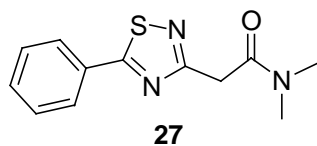

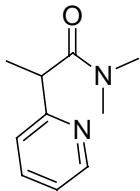

29

NMR Spectrum: H1  
Instrument: Varian inova500  
Solvent: CDCl3 Temp: 25.0  
ISIS: shenbo Date: Dec 7 2005

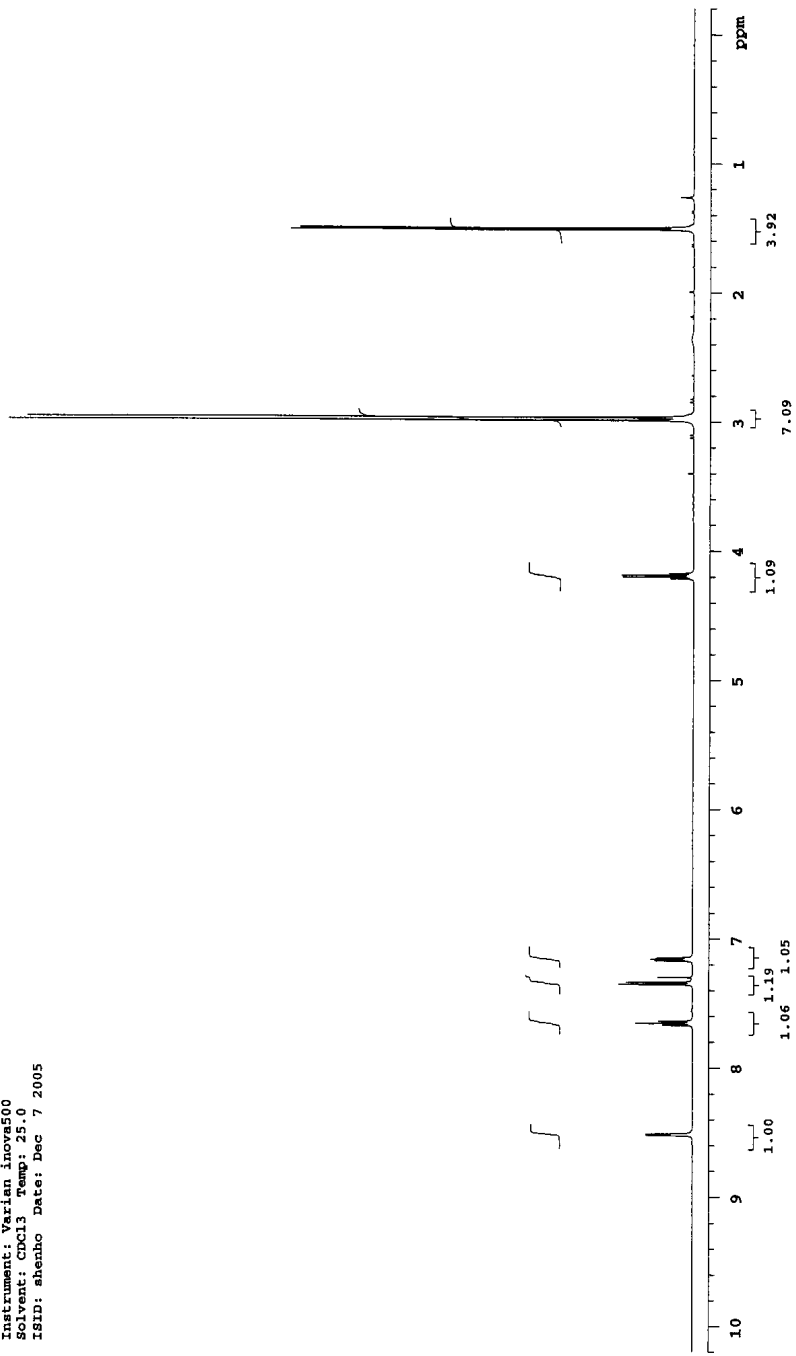

File ID: RY8004\_005568-1  
Date: 07-Dec-2005  
Path: C:\MassLynx\LC2M\_Low\_Pos.olg

Instrument:  
Time: 12:43:54

Submitter: Shen, Hong x1755 (SHENHO)  
Filename: RY800\_04\_0007252

MS ES+ :TIC Smooth (Mn, 1x1)

1.0e+008

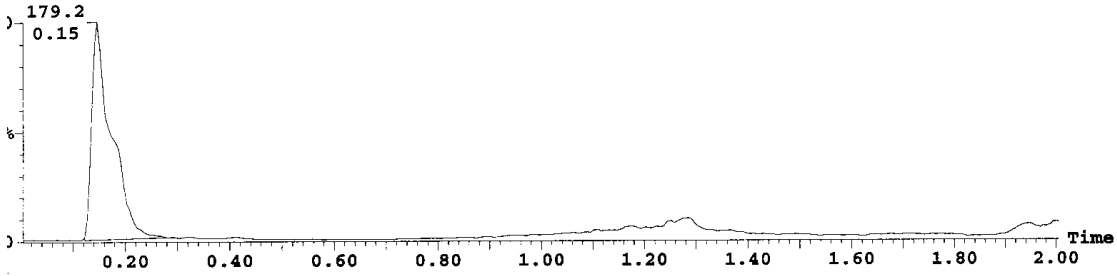

DAD: TIC

5.9e+006

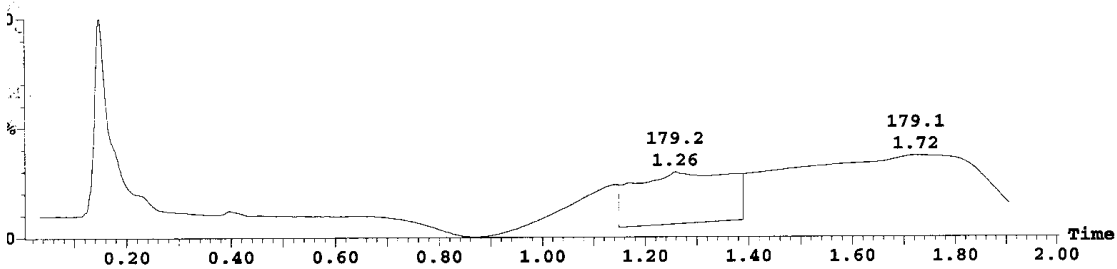

DAD: 254

9.9e+004

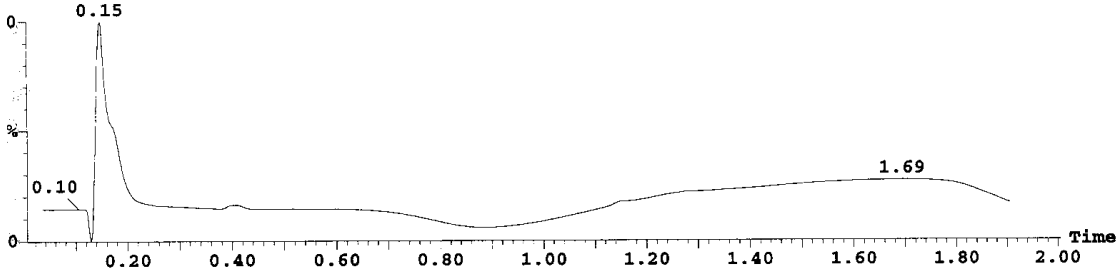

me: 0.15) Combine (23:39)

1:MS ES+  
2.9e+007

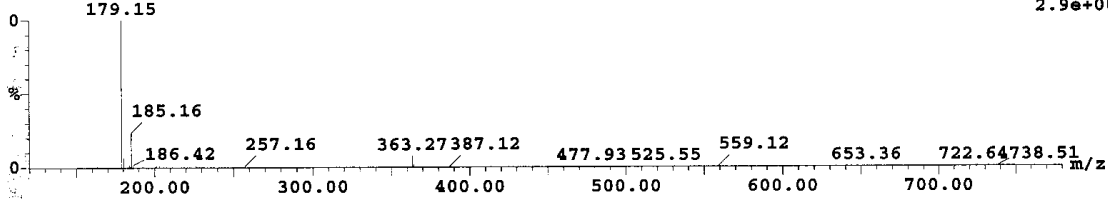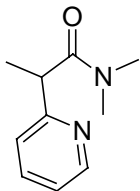

29

NMR Spectrum: H1  
Instrument: Varian inova500  
Solvent: CDCl3 Temp: 25.0  
ISID: shenhc Date: Nov 29 2005

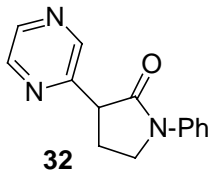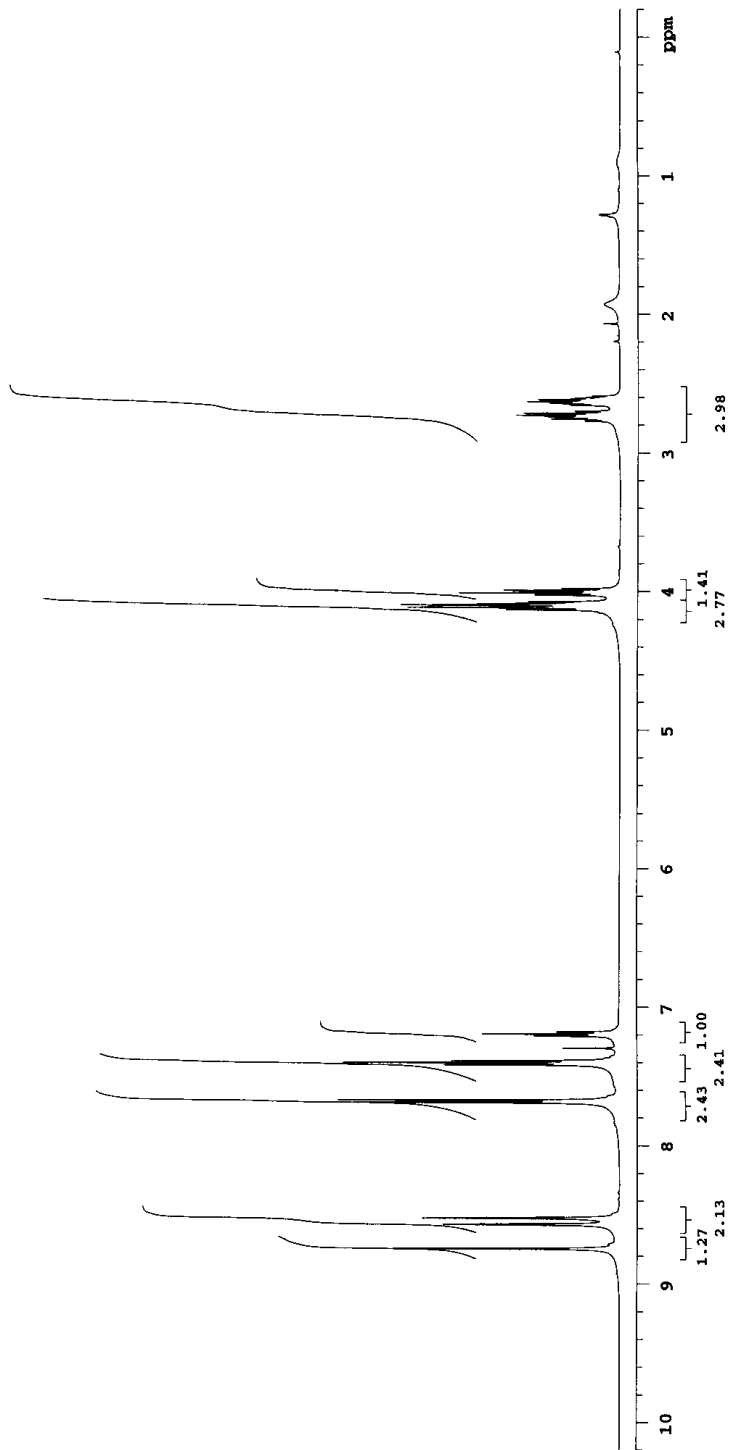



File ID: RY8004\_005335-1  
Date: 29-Nov-2005

Instrument:  
Time: 14:02:47

Submitter: Shen, Hong x1755 (SHENHO)  
Filename: RY800\_04\_0006923

Path: C:\MassLynx\LC2M\_Low\_Pos.olp

MS ES+ :TIC Smooth (Mn, 1x1) 240.2 0.95 4.2e+008

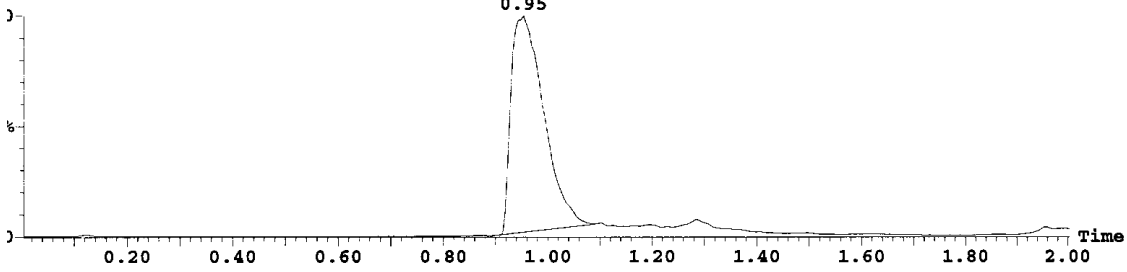

DAD: TIC 240.2 0.95 1.1e+008

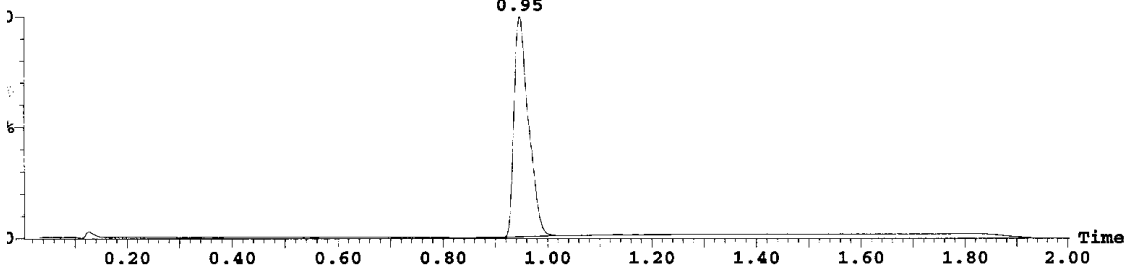

DAD: 254 0.95 2.9e+006

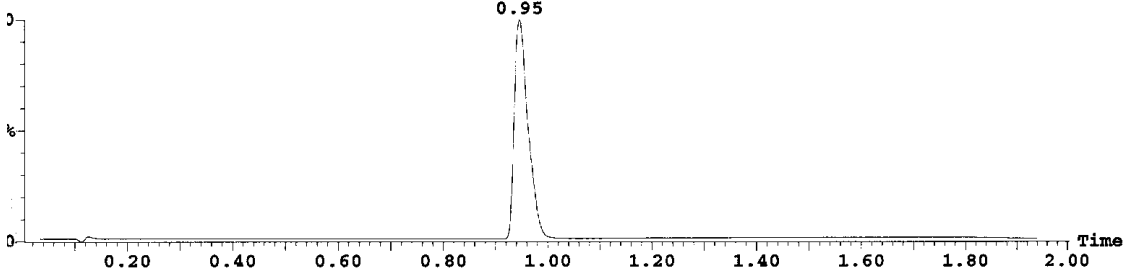

me: 0.95) Combine (181:196) 240.21 262.16 1:MS ES+ 1.1e+008

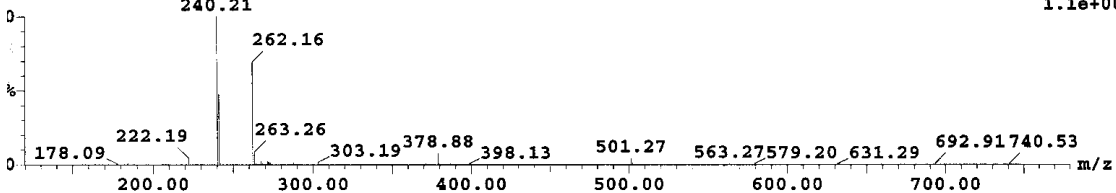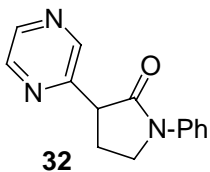

Instrument: Varian inova500  
Solvent: CDCl3 Temp: 25.0  
ISID: shenho Date: Nov 23 2005

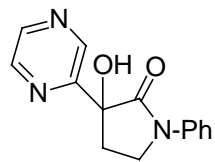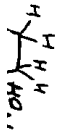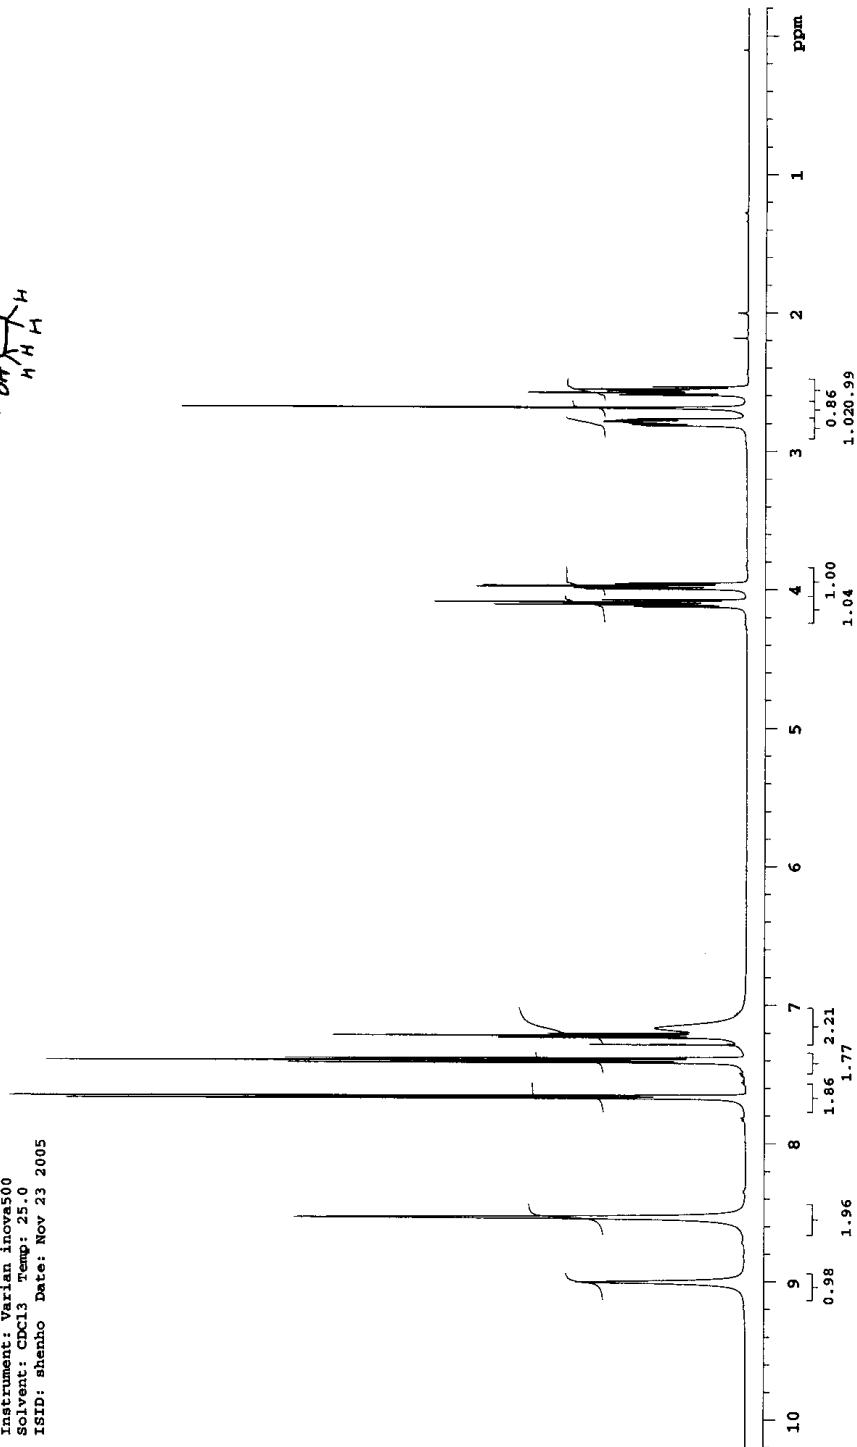

Sample ID:1

Instrument:

Submitter:Shen, Hong x1755 (SHENHO)

Date:23-Nov-2005

Time:13:38:42

Filename:RY800\_04\_0006892

Method:C:\Masslynx\LC2M\_Low\_Pos.plp

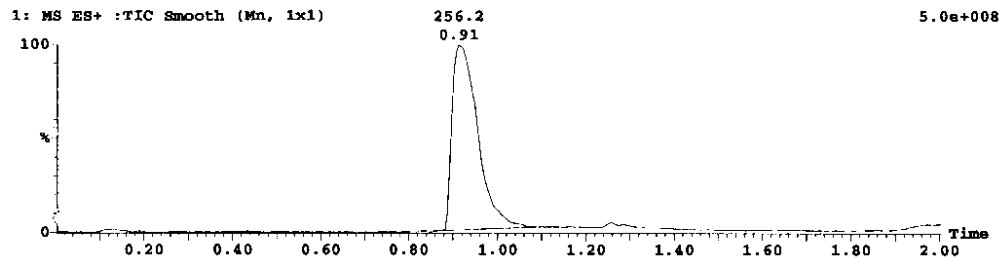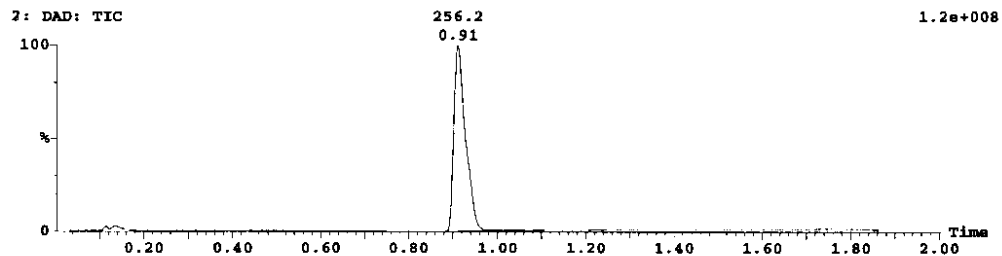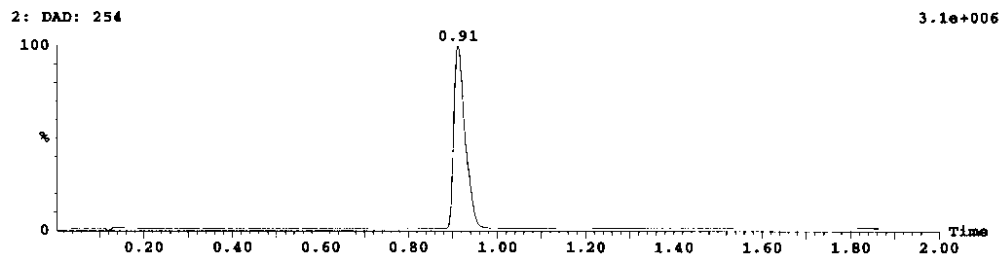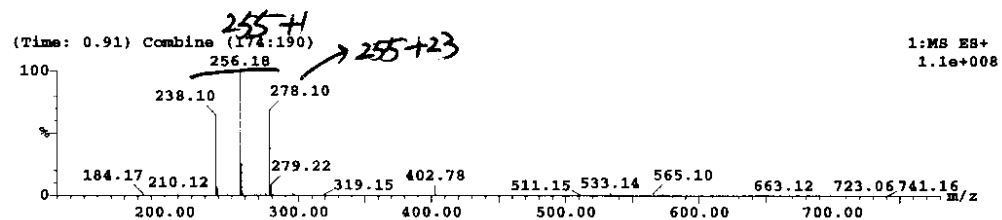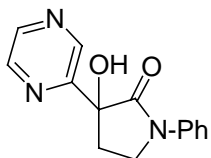

33

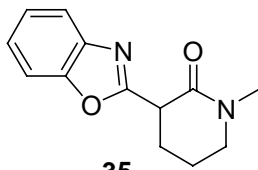

NMR Spectrum: H1  
Instrument: Varian inova500  
Solvent: CDCl3 Temp: 25.0  
ISID: shenhc Date: Dec 5 2005

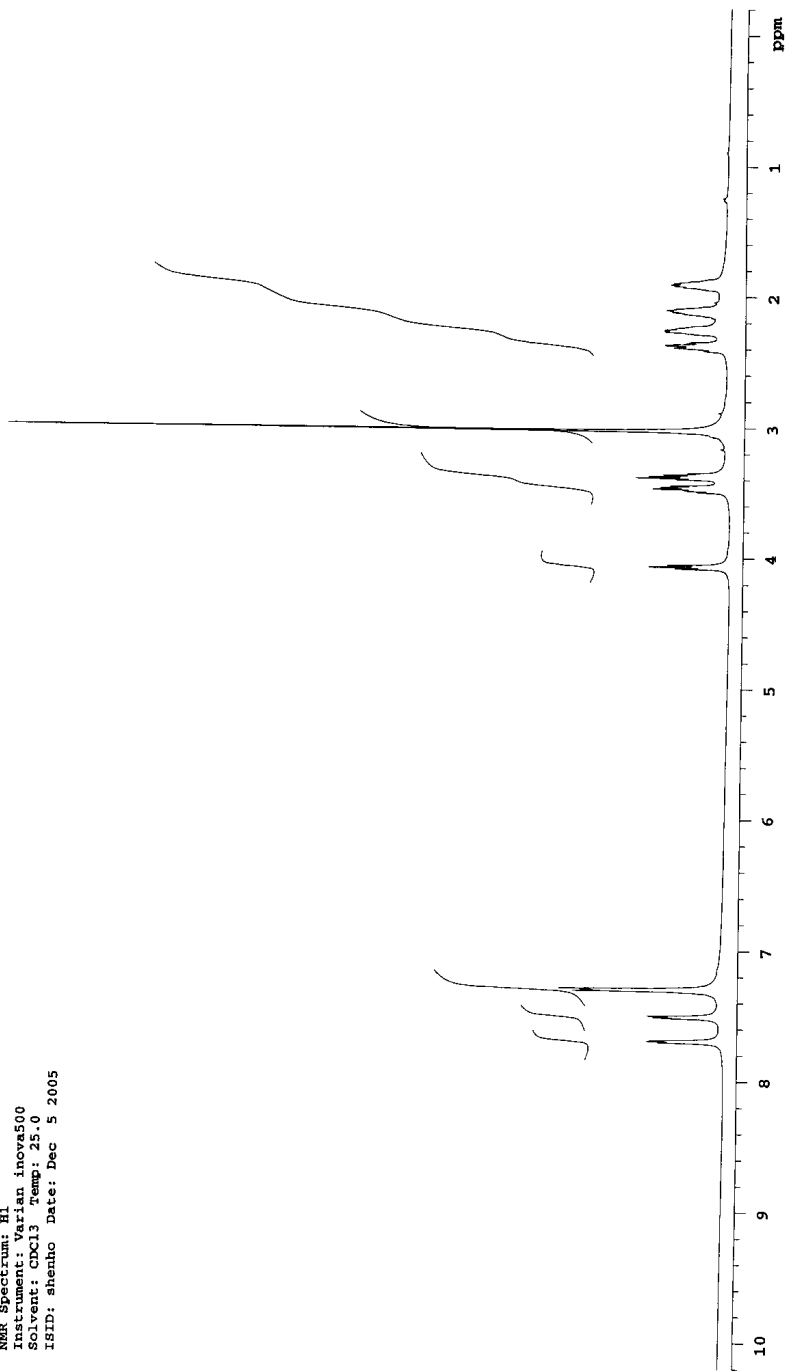

File ID: RY8004\_005501-1  
05-Dec-2005  
Path: C:\MassLynx\LC2M\_Low\_Pos.olp

Instrument:  
Time: 18:34:46

Submitter: Shen, Hong x1755 (SHENHO)  
Filename: RY800\_04\_0007145

MS ES+ : TIC Smooth (Mn, 1x1) 231.2 0.96 5.6e+008

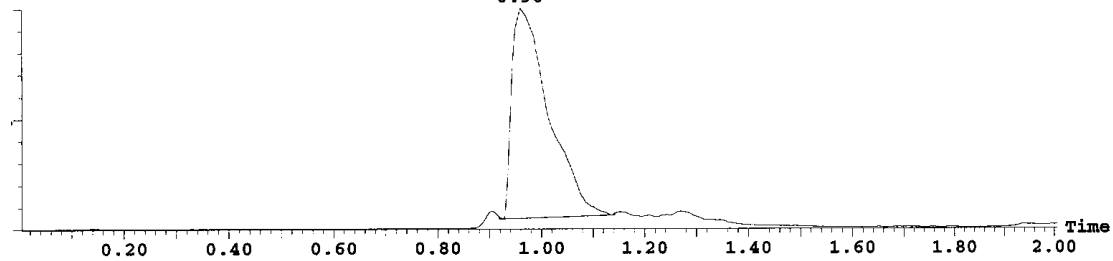

MS AD: TIC 231.2 0.96 9.1e+007

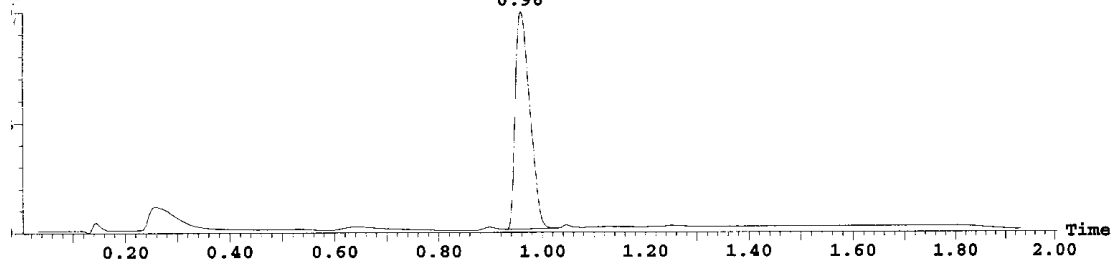

MS AD: 254 0.96 1.2e+006

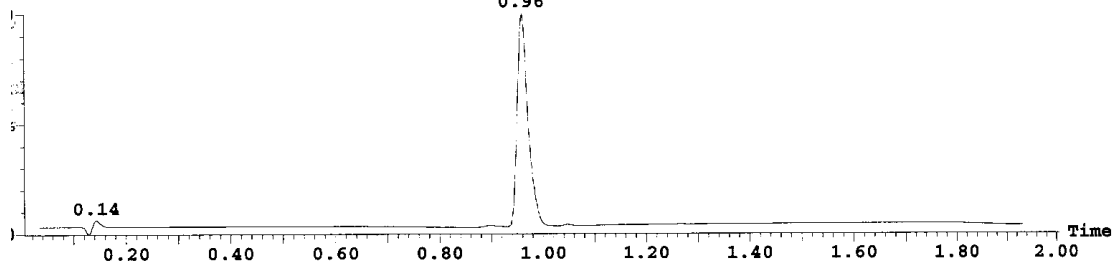

MS Spectrum (0.96) Combine (183:199) 1:MS ES+ 1.2e+008

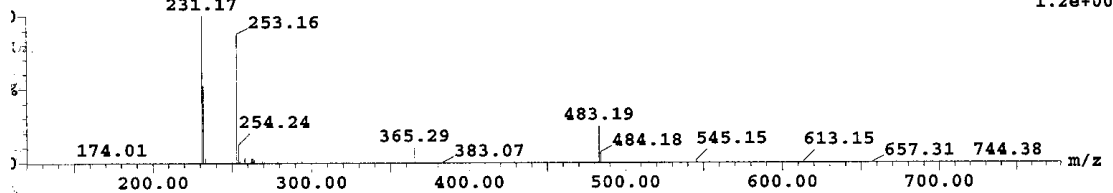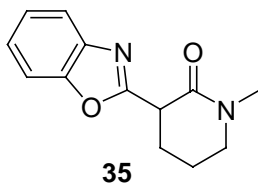

NMR Spectrum: H1  
Instrument: Varian inova500  
Solvent: CDCl3 Temp: 25.0  
ISID: shenho Date: Dec 1 2005

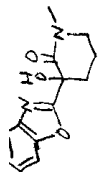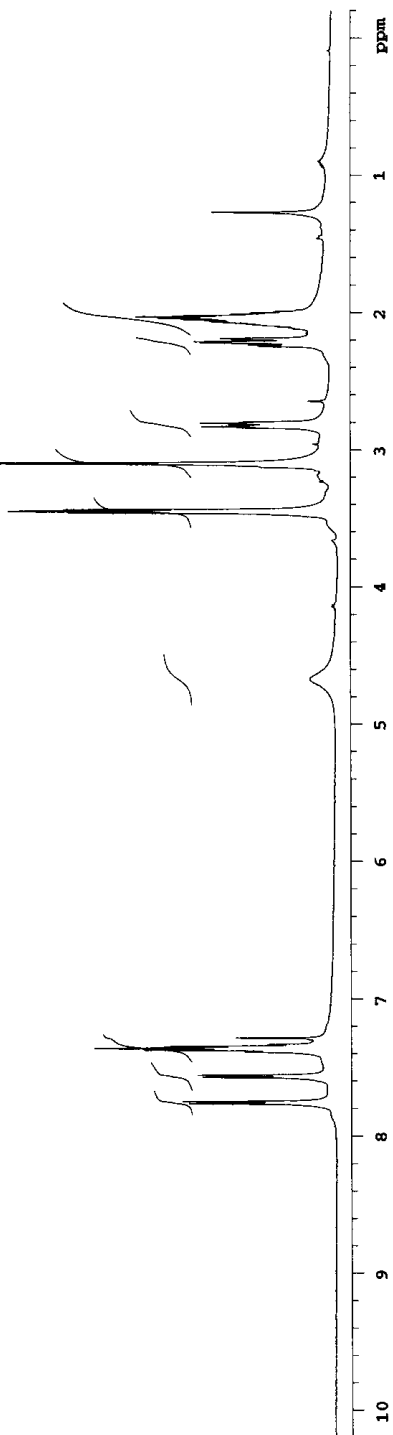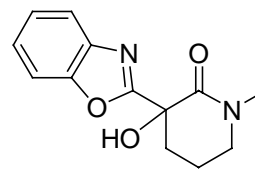

36

MS ES+ :TIC Smooth (Mn, 1x1) 247.2 4.0e+008  
0.87

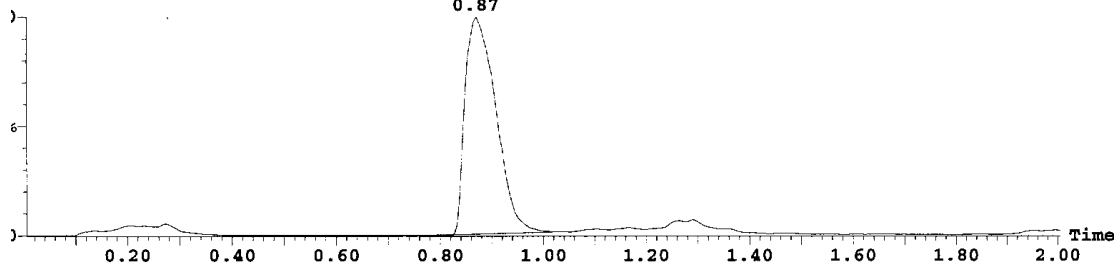

DAD: TIC 247.2 4.3e+007  
0.86

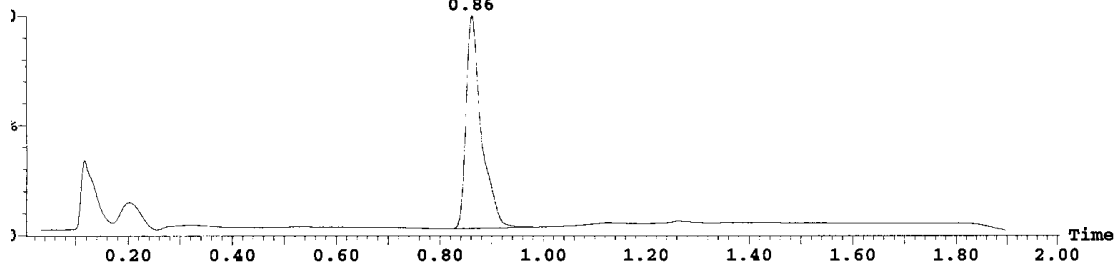

DAD: 254 0.86 3.9e+005

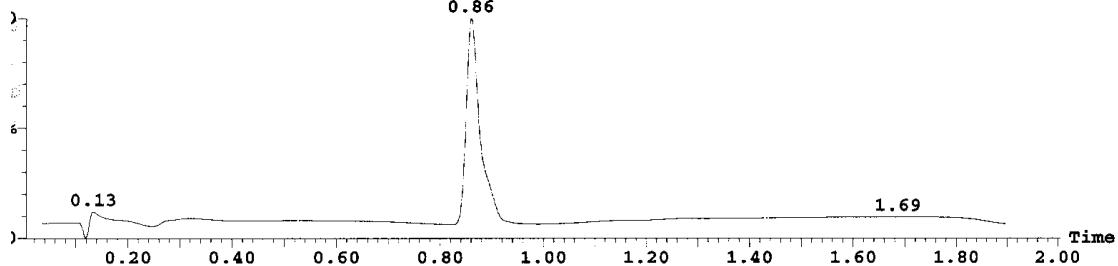

pe: 0.86) Combine (164:179) 247.18 269.13 1:MS ES+ 8.7e+007

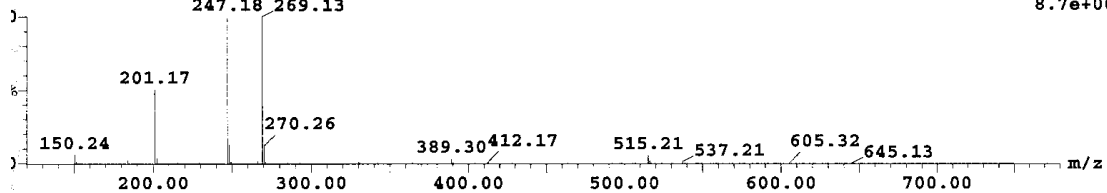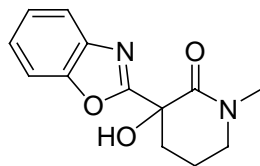

36

NMR Spectrum: H1  
Instrument: Varian inovo500  
Solvent: CDCl3 Temp: 25.0  
ISID: shenho Date: Dec 6 2005

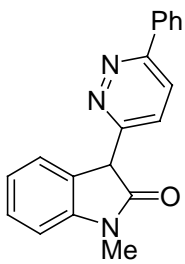

39

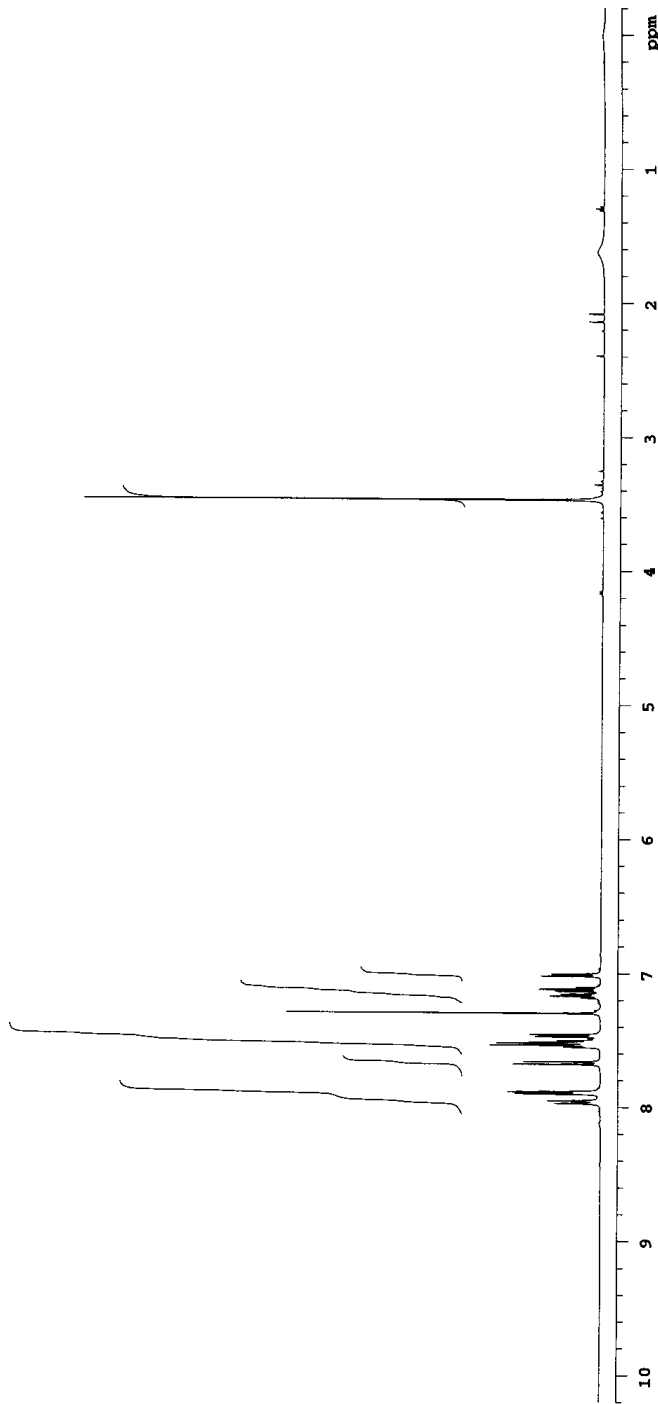



File ID: RY8004\_005540-1  
Date: 06-Dec-2005  
Path: od:C:\MassLynx\LC2M\_Low\_Pos.olp

Instrument:  
Time: 16:24:21

Submitter: Shen, Hong x1755 (SHENHO)  
Filename: RY800\_04\_0007215

MS ES+ :TIC Smooth (Mn, 1x1) 302.2 1.20 2.2e+008

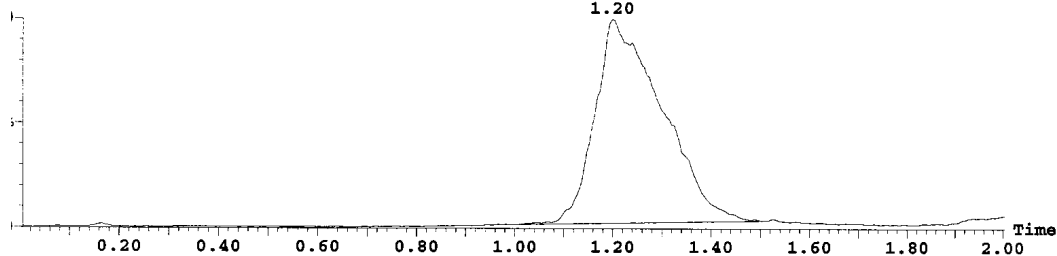

MS AD: TIC 302.2 1.20 1.2e+008

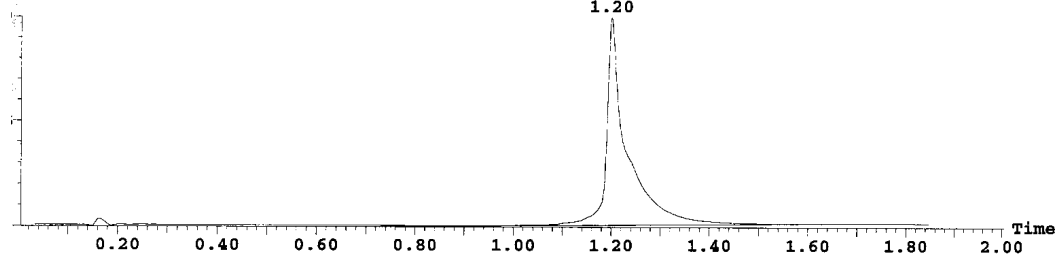

MS AD: 254 1.20 1.0e+006

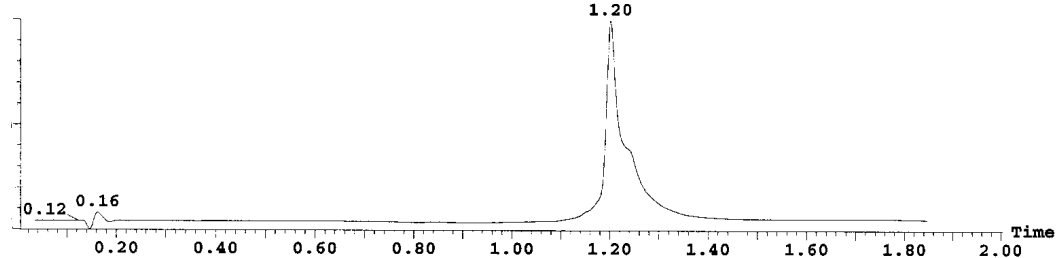

MS Spectrum: 1.20) Combine (230:246) 302.18 1:MS ES+ 1.0e+008

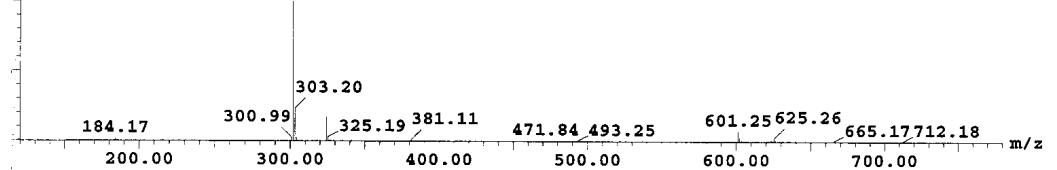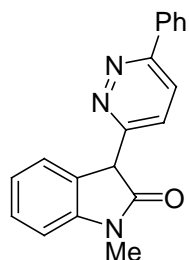

39

Instrument: Varian inova500  
Solvent: CDCl3 Temp: 25.0  
ISID: shenbo Date: Dec 6 2005

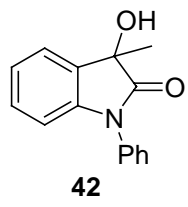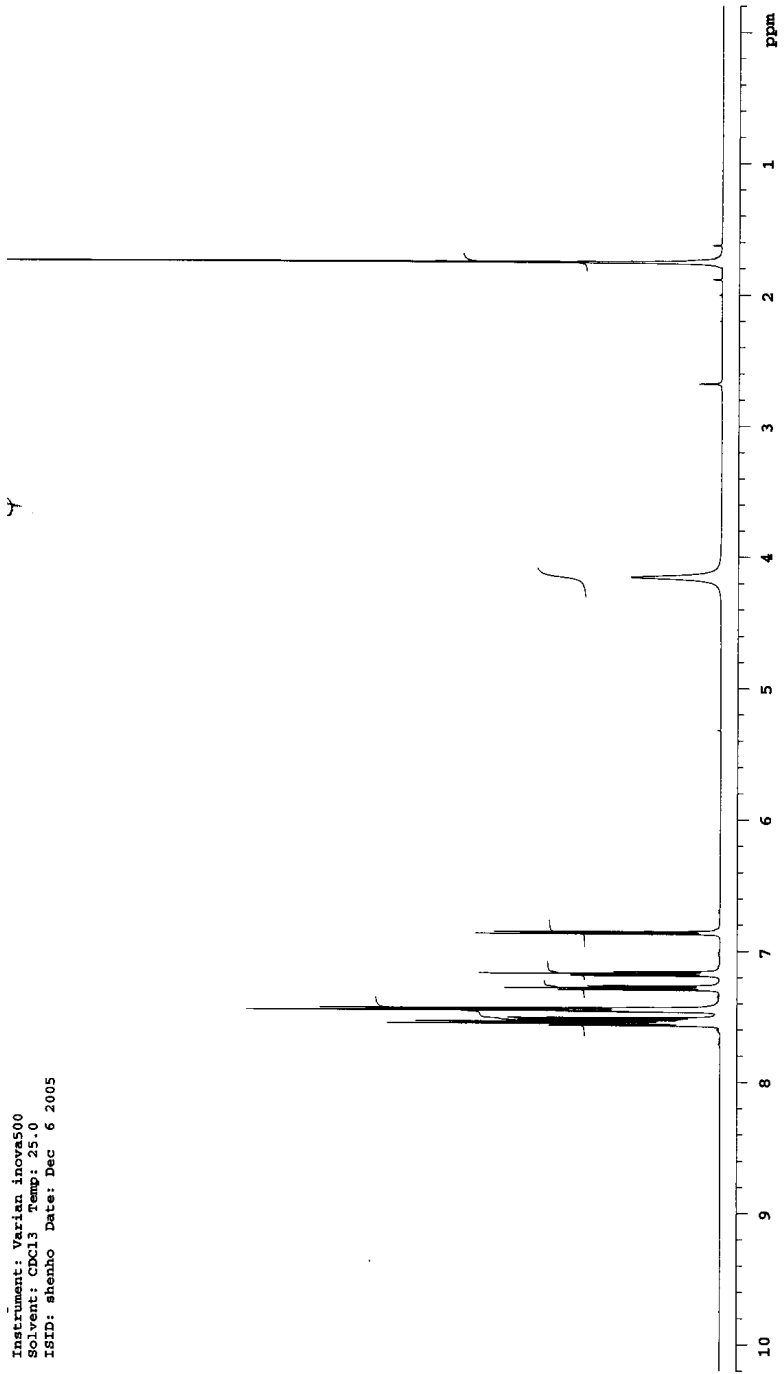

Sample ID:4

Instrument:

Submitter:Shen, Hong x1755 (SHENHO)

Date:06-Dec-2005

Time:09:08:45

Filename:RY800\_04\_0007154

Method:C:\MassLynx\LC2M\_Low\_Pos.plp

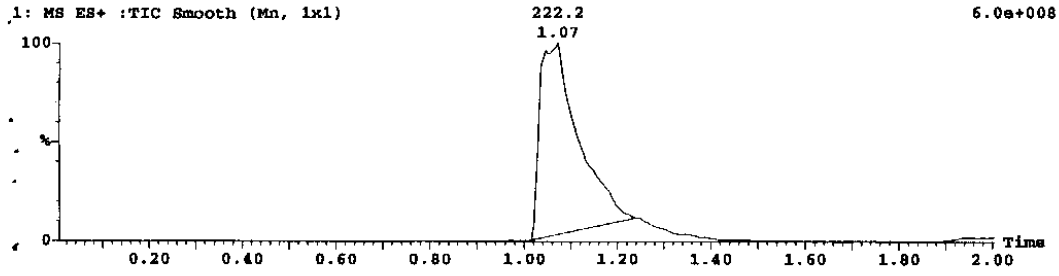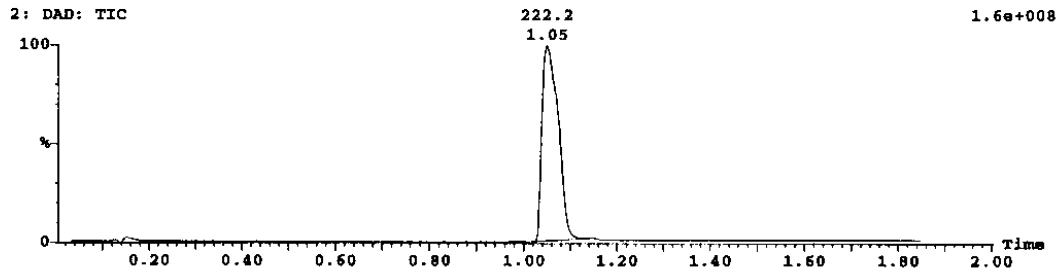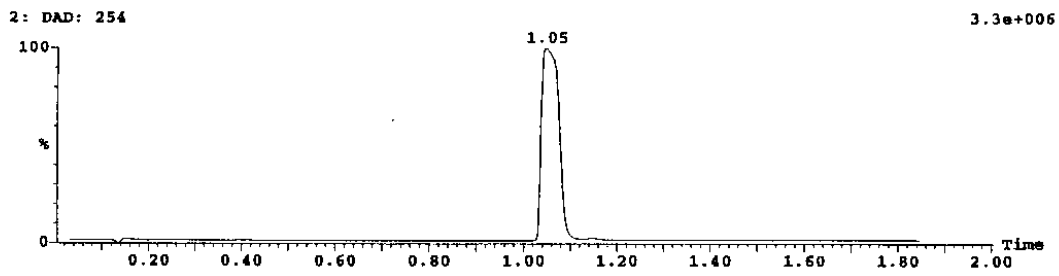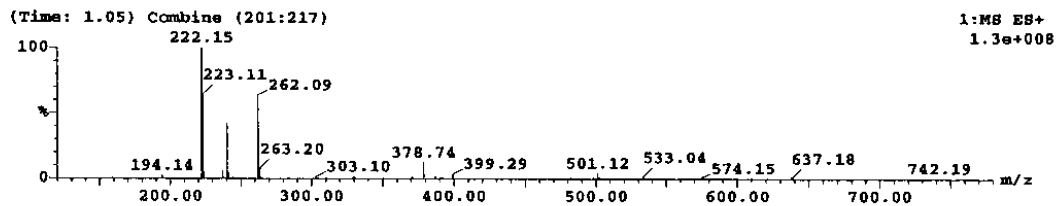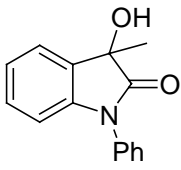

42

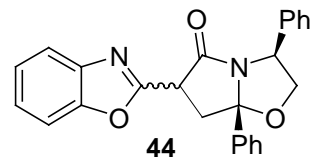

NMR Spectrum: H1  
 Instrument: Varian inova500  
 Solvent: CDCl3 Temp: 25.0  
 ISID: shenho Date: Nov 30 2005

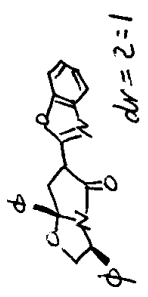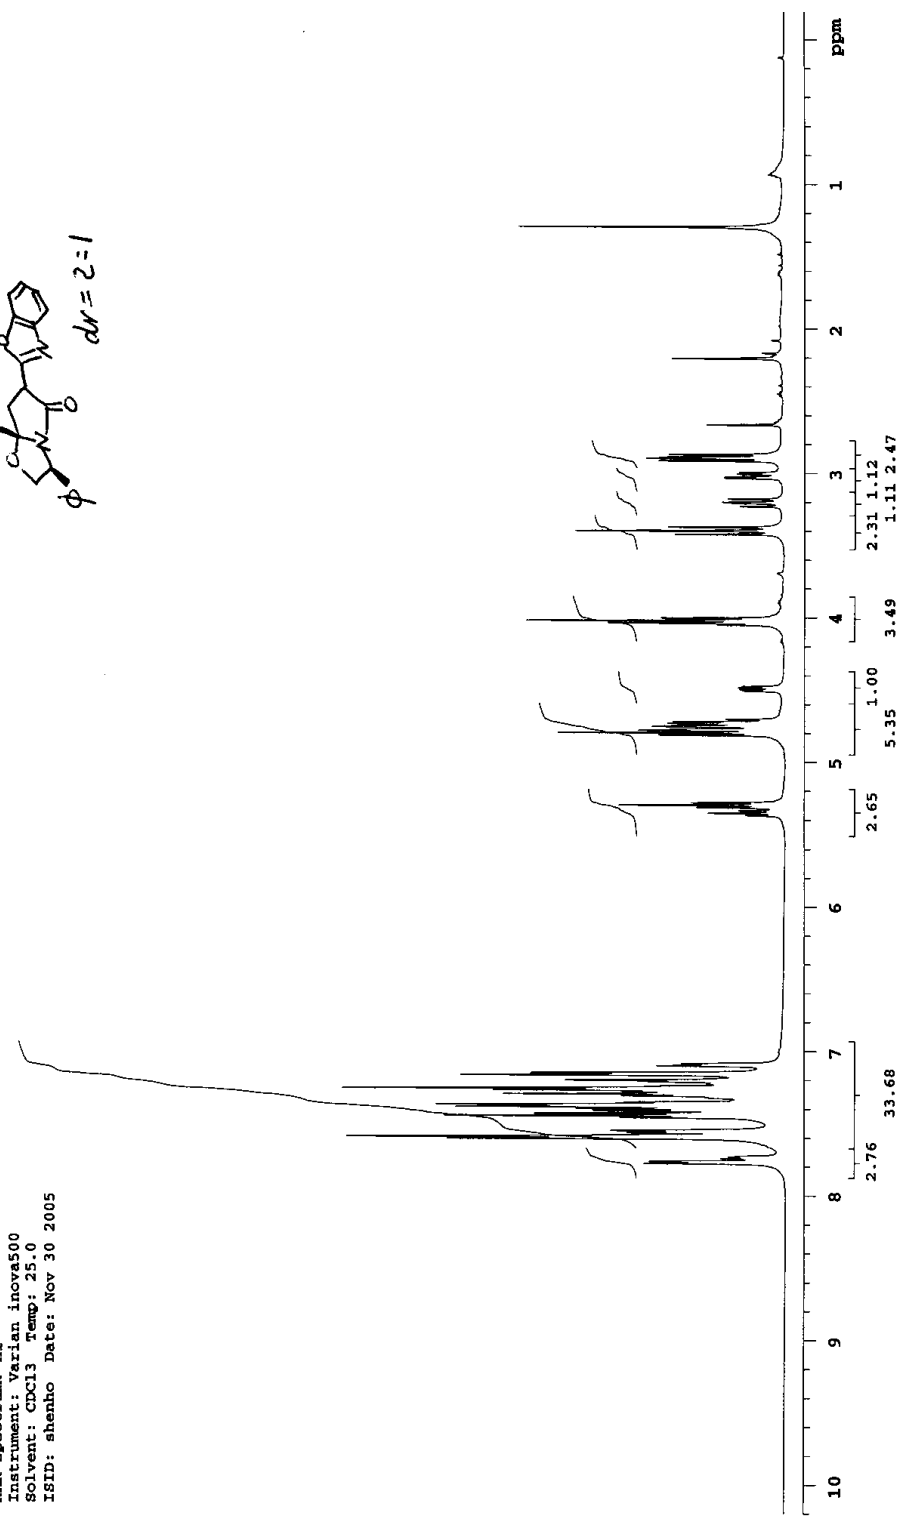

Sample ID: RY8004\_005374-1

Instrument:  
Time: 17:58:28

Submitter: Shen, Hong x1755 (SHENHO)  
Filename: RY800\_04\_0006979

Method: C:\MassLynx\LC2M\_Low\_Pos.olp

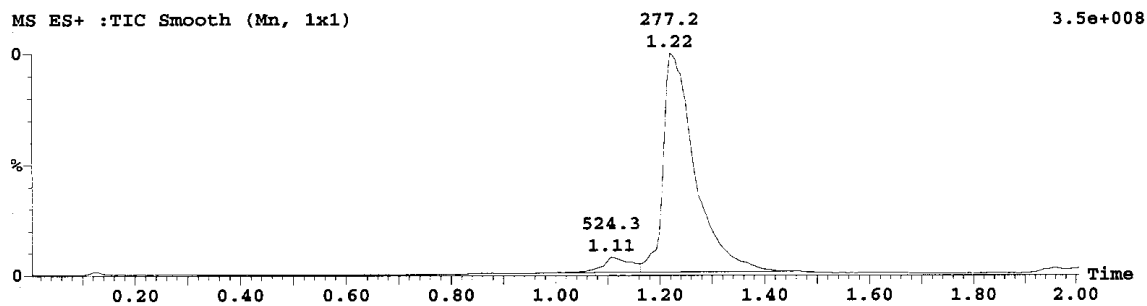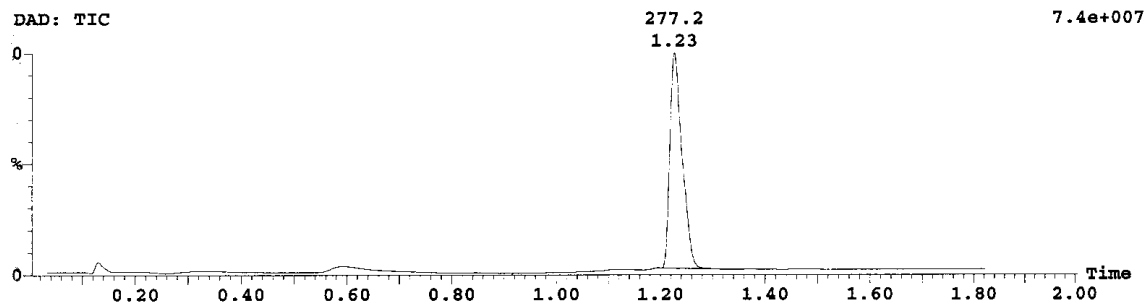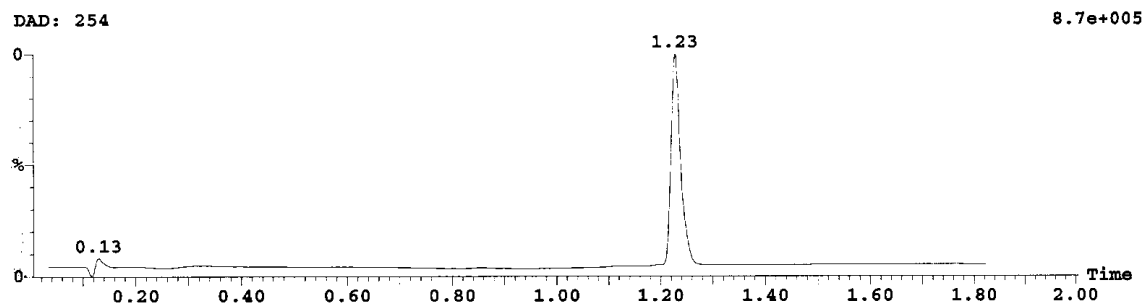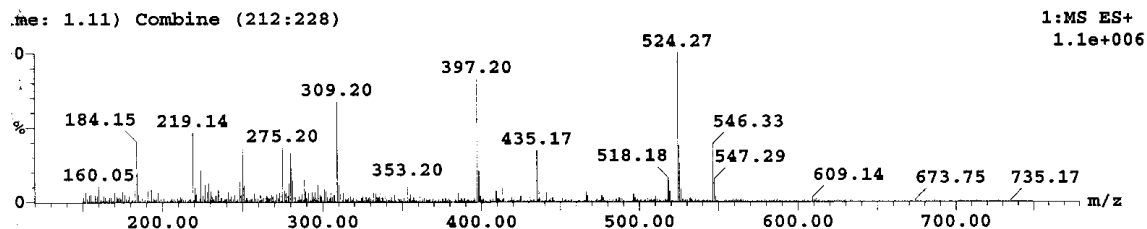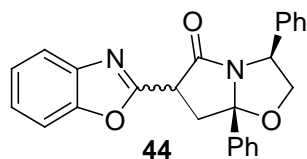

Sample ID: RY8004\_005374-1

Instrument:  
Time: 17:58:28

Submitter: Shen, Hong x1755 (SHENHO)  
Filename: RY800\_04\_0006979

Date: 30-Nov-2005

Method: C:\MassLynx\LC2M\_Low\_Pos.d

Trace: 1.23) Combine (236:252)

1:MS ES+  
7.7e+007

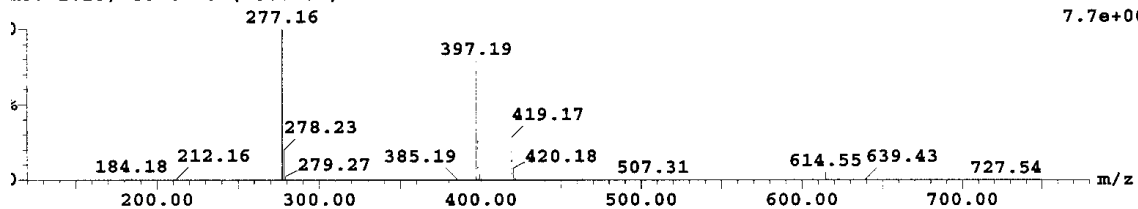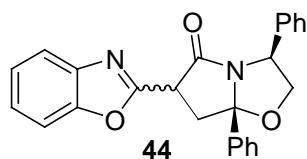

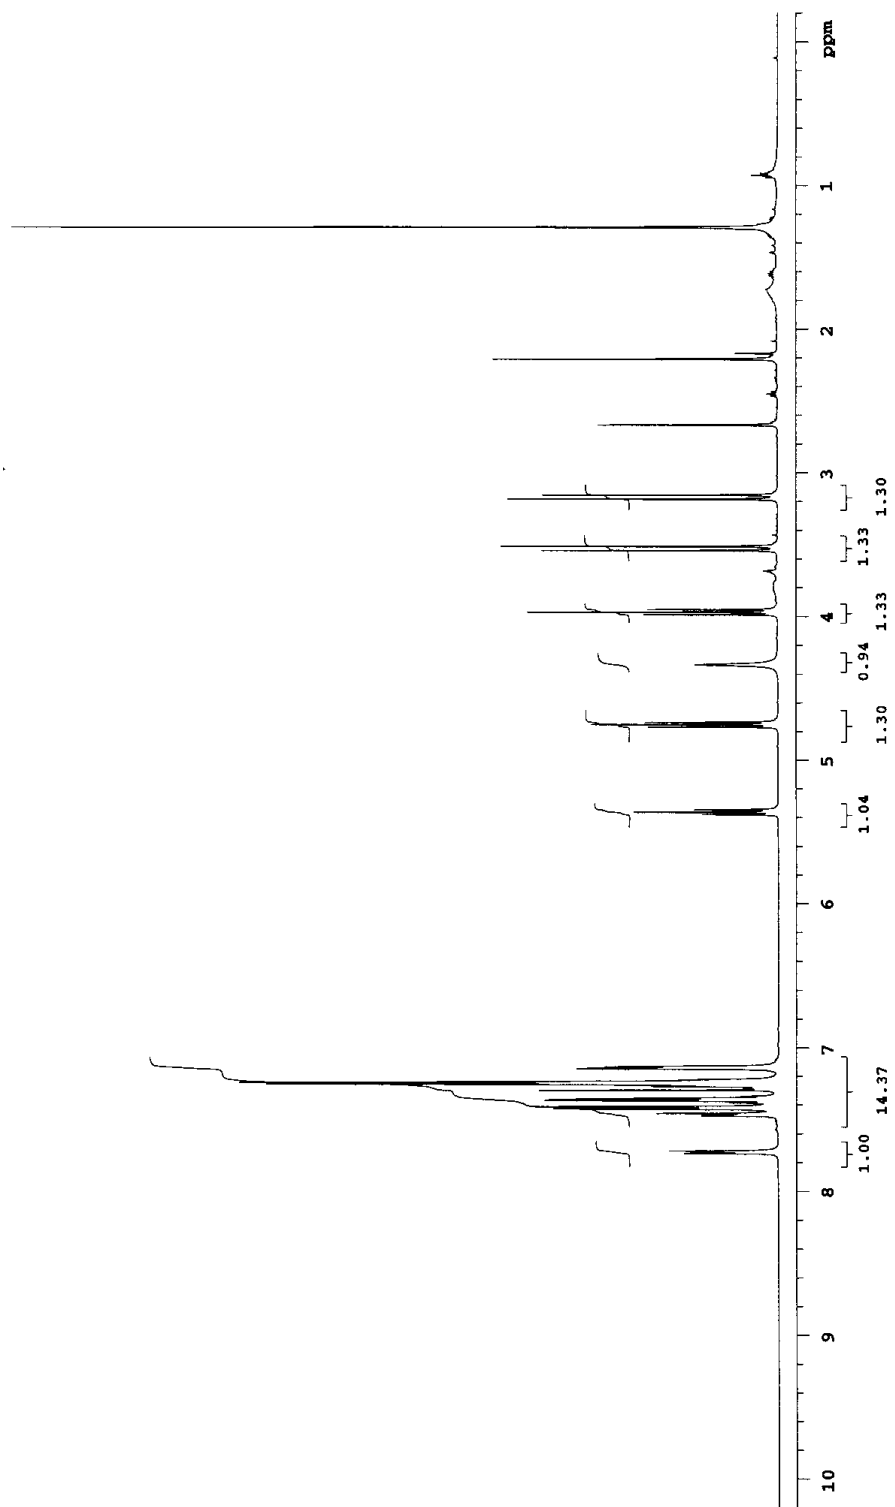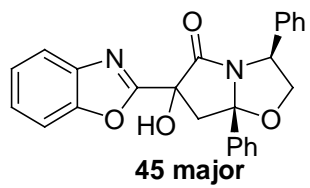

sic Chemistry Open Access LC/MS Report

Sample ID: RY8004\_005376-1  
Date: 30-Nov-2005  
Method: C:\MassLynx\LC2M\_Low\_Pos.olg

Instrument:  
Time: 18:47:19

Page 1  
Submitter: Shen, Hong x1755 (SHENHO)  
Filename: RY800\_04\_0006981

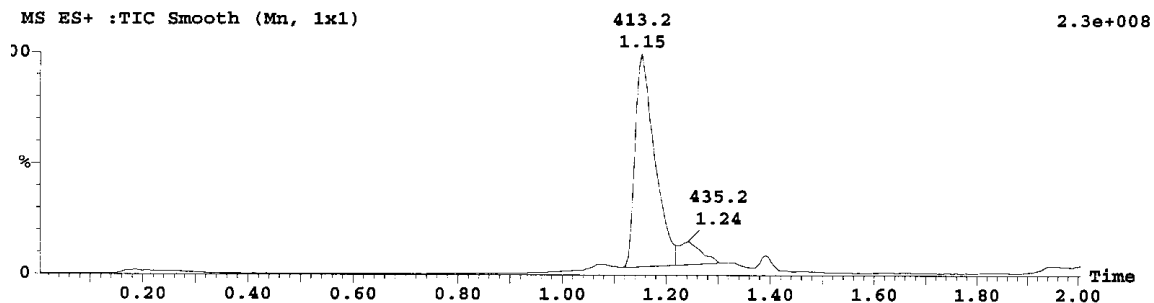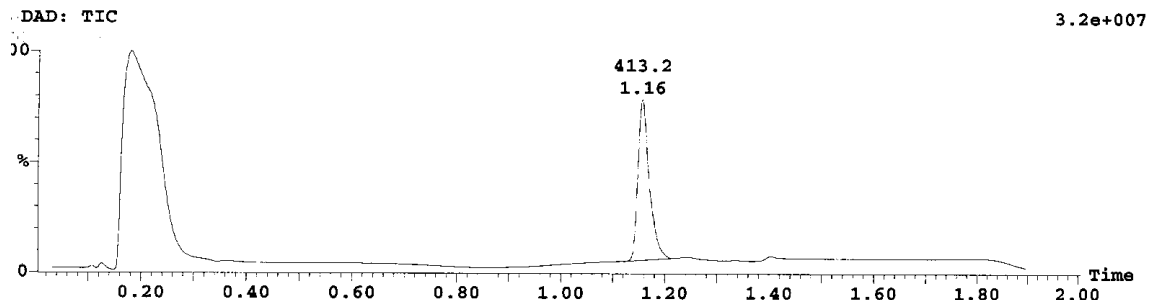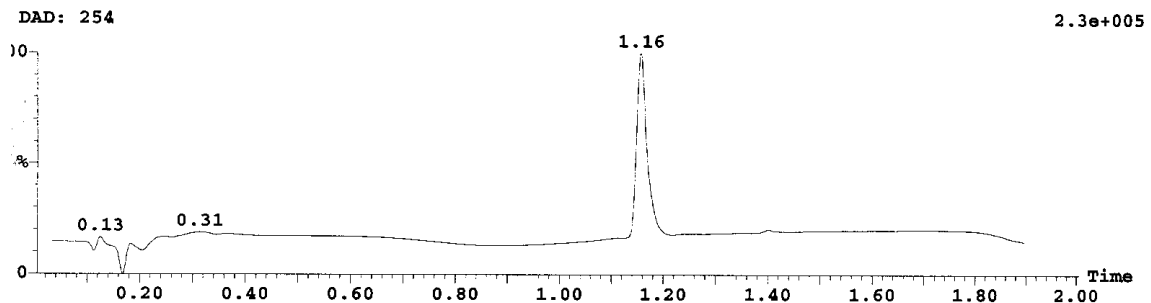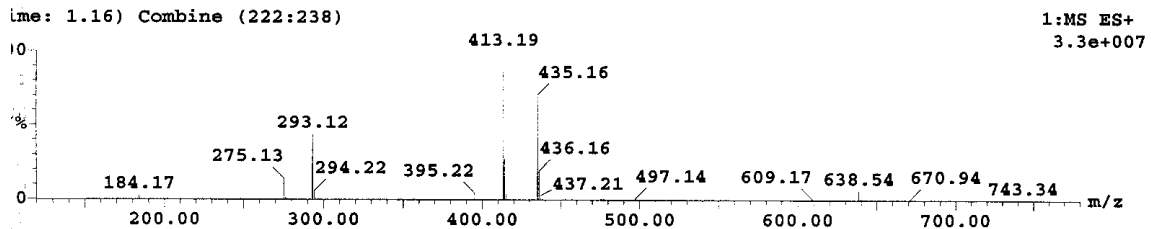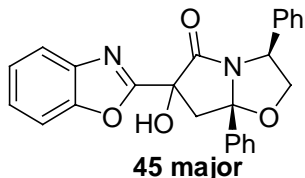



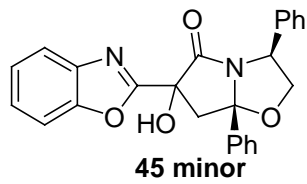

NMR Spectrum: H1  
 Instrument: Varian.inova500  
 Solvent: CDCl3 Temp: 25.0  
 ISID: shenhc Date: Dec 5 2005

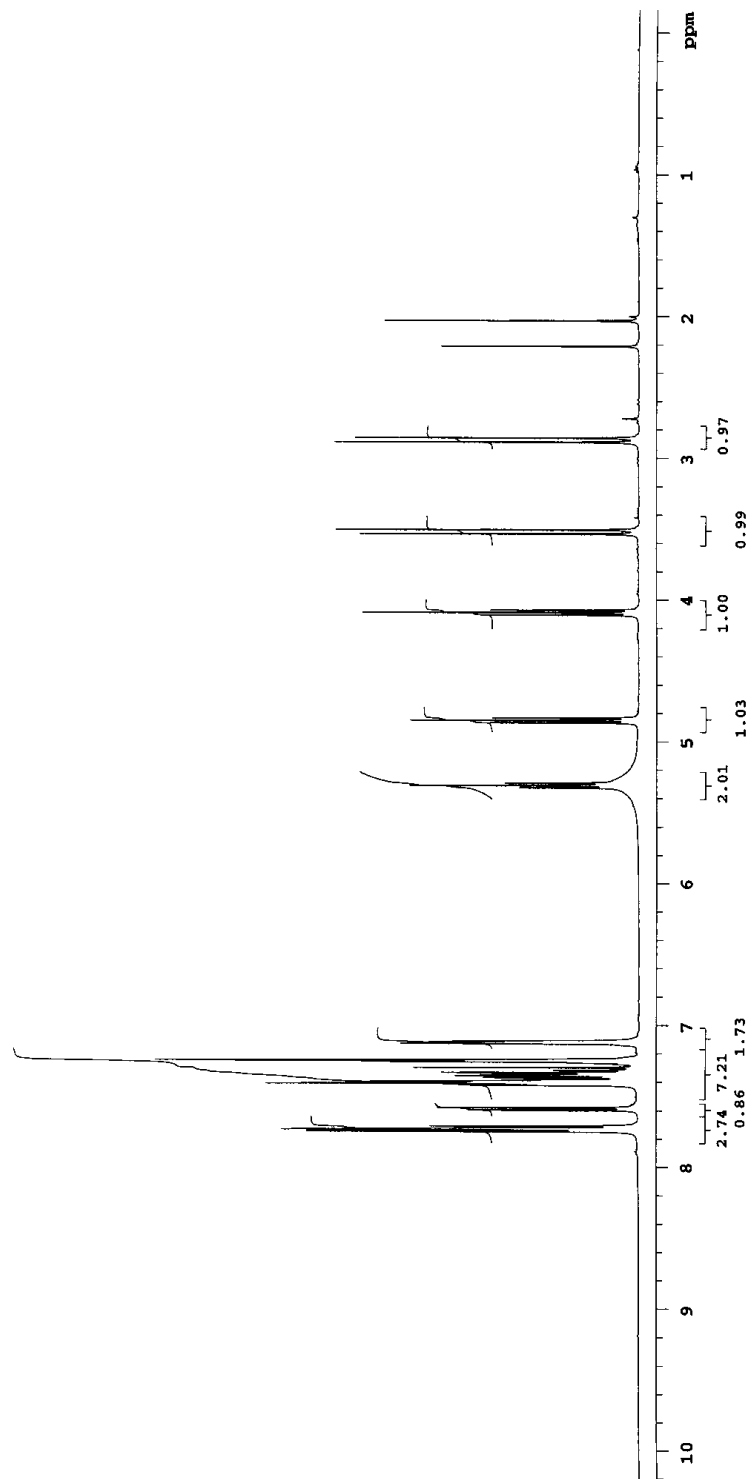

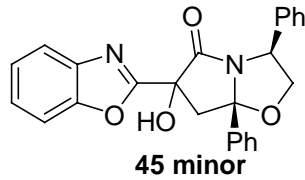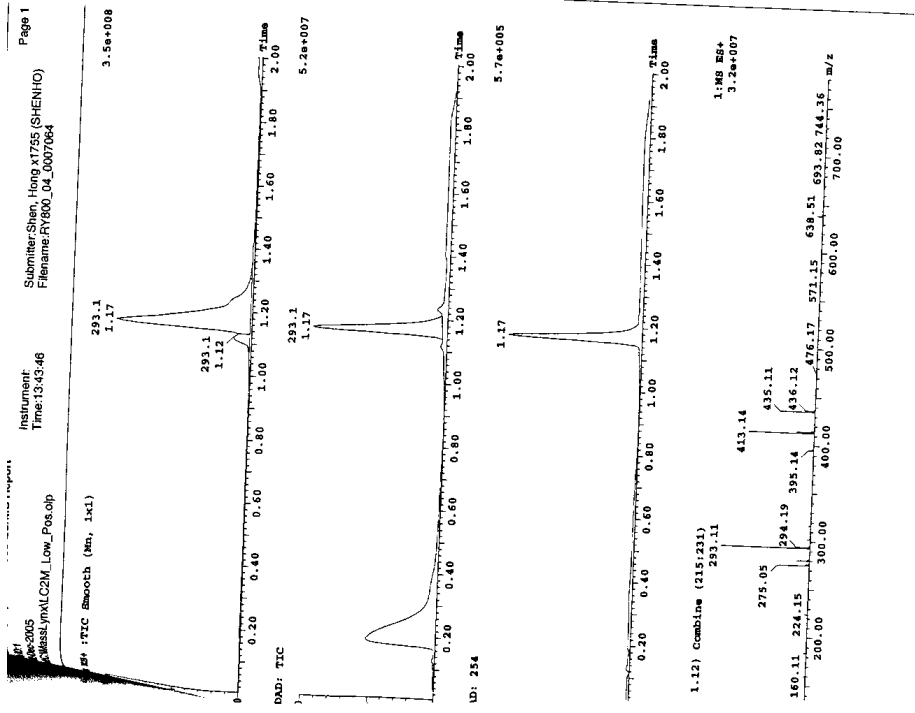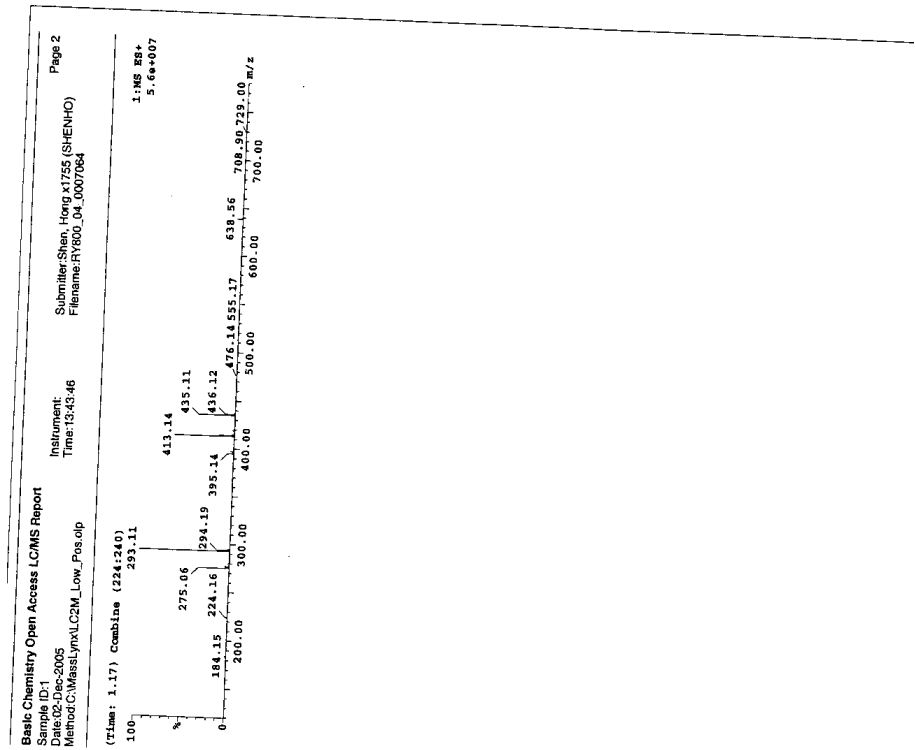

Supplement: Supplementary file 1 [file 5064613]
